# Supplementary material
Source: publisher figshare collection journal article supplement (https://geolsoc.figshare.com/articles/dataset/_/3453971)

**Table A1: T11N08 monazites**

| File#     | Spot# | Pb ppm <sup>1</sup> | Th ppm <sup>1</sup> | U ppm <sup>1</sup> | Th/U | <sup>208</sup> Pb/ <sup>232</sup> Th <sup>2</sup> | 2 σ error<br><sup>208</sup> Pb/ <sup>232</sup> Th | <sup>206</sup> Pb/ <sup>238</sup> U <sup>2</sup> | 2 σ error<br><sup>206</sup> Pb/ <sup>238</sup> U | Age (Ma)<br><sup>208</sup> Pb/ <sup>232</sup> Th | 2 σ error<br><sup>208</sup> Pb/ <sup>232</sup> Th | Age<br>population |
|-----------|-------|---------------------|---------------------|--------------------|------|---------------------------------------------------|---------------------------------------------------|--------------------------------------------------|--------------------------------------------------|--------------------------------------------------|---------------------------------------------------|-------------------|
| 06060711a | 02c   | 58                  | 51821               | 10680              | 4.9  | 0.00076                                           | 0.00003                                           | 0.00255                                          | 0.00009                                          | 15.3                                             | 0.5                                               | 1                 |
| 07060711a | 03b   | 54                  | 47609               | 9235               | 5.2  | 0.00077                                           | 0.00003                                           | 0.00260                                          | 0.00009                                          | 15.6                                             | 0.5                                               | 1                 |
| 08060711a | 04b   | 64                  | 34433               | 19283              | 1.8  | 0.00080                                           | 0.00003                                           | 0.00246                                          | 0.00009                                          | 16.1                                             | 0.5                                               | 1                 |
| 09060711a | 05c   | 56                  | 45492               | 11565              | 3.9  | 0.00078                                           | 0.00003                                           | 0.00263                                          | 0.00009                                          | 15.8                                             | 0.5                                               | 1                 |
| 10060711a | 06c   | 49                  | 45626               | 7778               | 5.9  | 0.00078                                           | 0.00003                                           | 0.00271                                          | 0.00009                                          | 15.7                                             | 0.5                                               | 1                 |
| 11060711a | 07c   | 61                  | 53010               | 10670              | 5.0  | 0.00079                                           | 0.00003                                           | 0.00267                                          | 0.00009                                          | 16.0                                             | 0.5                                               | 1                 |
| 12060711a | 08c   | 44                  | 40677               | 6927               | 5.9  | 0.00079                                           | 0.00003                                           | 0.00260                                          | 0.00009                                          | 16.1                                             | 0.5                                               | 1                 |
| 16060711a | 11c   | 47                  | 42023               | 7593               | 5.5  | 0.00079                                           | 0.00003                                           | 0.00261                                          | 0.00009                                          | 15.9                                             | 0.5                                               | 1                 |
| 17060711a | 12c   | 56                  | 43769               | 11846              | 3.7  | 0.00076                                           | 0.00003                                           | 0.00259                                          | 0.00009                                          | 15.4                                             | 0.5                                               | 1                 |
| 18060711a | 13c   | 48                  | 35585               | 11530              | 3.1  | 0.00077                                           | 0.00003                                           | 0.00247                                          | 0.00009                                          | 15.5                                             | 0.5                                               | 1                 |
| 19060711a | 14c   | 73                  | 50315               | 18964              | 2.7  | 0.00078                                           | 0.00003                                           | 0.00251                                          | 0.00009                                          | 15.8                                             | 0.5                                               | 1                 |
| 20060711a | 15c   | 54                  | 50370               | 9198               | 5.5  | 0.00077                                           | 0.00003                                           | 0.00255                                          | 0.00009                                          | 15.6                                             | 0.5                                               | 1                 |
| 21060711a | 16b   | 65                  | 43762               | 16465              | 2.7  | 0.00079                                           | 0.00003                                           | 0.00251                                          | 0.00009                                          | 16.0                                             | 0.5                                               | 1                 |
| 24060711a | 17c   | 43                  | 37926               | 7514               | 5.0  | 0.00078                                           | 0.00003                                           | 0.00251                                          | 0.00009                                          | 15.8                                             | 0.5                                               | 1                 |
| 25060711a | 18c   | 59                  | 50798               | 10805              | 4.7  | 0.00077                                           | 0.00003                                           | 0.00259                                          | 0.00009                                          | 15.5                                             | 0.5                                               | 1                 |
| 27060711a | 20c   | 40                  | 32907               | 7449               | 4.4  | 0.00079                                           | 0.00003                                           | 0.00250                                          | 0.00009                                          | 16.0                                             | 0.5                                               | 1                 |
| 28060711a | 21b   | 38                  | 30905               | 8284               | 3.7  | 0.00079                                           | 0.00003                                           | 0.00244                                          | 0.00009                                          | 16.0                                             | 0.5                                               | 1                 |
| 29060711a | 22c   | 51                  | 44726               | 9092               | 4.9  | 0.00079                                           | 0.00003                                           | 0.00261                                          | 0.00009                                          | 16.0                                             | 0.5                                               | 1                 |
| 30060711a | 23c   | 51                  | 48532               | 8450               | 5.7  | 0.00077                                           | 0.00003                                           | 0.00248                                          | 0.00009                                          | 15.6                                             | 0.5                                               | 1                 |
| 31060711a | 24b   | 43                  | 41166               | 6965               | 5.9  | 0.00077                                           | 0.00003                                           | 0.00247                                          | 0.00009                                          | 15.6                                             | 0.5                                               | 1                 |

**Table A2: T11N09 monazites**

| File#     | Spot# | Pb ppm <sup>1</sup> | Th ppm <sup>1</sup> | U ppm <sup>1</sup> | Th/U | <sup>208</sup> Pb/ <sup>232</sup> Th <sup>2</sup> | 2 σ error<br><sup>208</sup> Pb/ <sup>232</sup> Th | <sup>206</sup> Pb/ <sup>238</sup> U <sup>2</sup> | 2 σ error<br><sup>206</sup> Pb/ <sup>238</sup> U | Age (Ma)<br><sup>208</sup> Pb/ <sup>232</sup> Th | 2 σ error<br><sup>208</sup> Pb/ <sup>232</sup> Th | Age<br>population |
|-----------|-------|---------------------|---------------------|--------------------|------|---------------------------------------------------|---------------------------------------------------|--------------------------------------------------|--------------------------------------------------|--------------------------------------------------|---------------------------------------------------|-------------------|
| 05060711b | 01c   | 42                  | 36109               | 5953               | 6.1  | 0.00087                                           | 0.00003                                           | 0.00278                                          | 0.00009                                          | 17.7                                             | 0.5                                               | 1                 |
| 06060711b | 02c   | 40                  | 36653               | 4262               | 8.6  | 0.00090                                           | 0.00003                                           | 0.00280                                          | 0.00009                                          | 18.2                                             | 0.6                                               | 1                 |
| 07060711b | 03b   | 60                  | 56742               | 5970               | 9.5  | 0.00090                                           | 0.00003                                           | 0.00281                                          | 0.00009                                          | 18.1                                             | 0.5                                               | 1                 |
| 08060711b | 04b   | 38                  | 34397               | 4533               | 7.6  | 0.00087                                           | 0.00003                                           | 0.00285                                          | 0.00009                                          | 17.5                                             | 0.5                                               | 1                 |
| 09060711b | 05c   | 41                  | 34460               | 6208               | 5.6  | 0.00086                                           | 0.00003                                           | 0.00272                                          | 0.00009                                          | 17.3                                             | 0.5                                               | 1                 |
| 10060711b | 06c   | 45                  | 45218               | 4159               | 10.9 | 0.00087                                           | 0.00003                                           | 0.00267                                          | 0.00009                                          | 17.5                                             | 0.5                                               | 1                 |
| 11060711b | 07c   | 49                  | 47201               | 4993               | 9.5  | 0.00086                                           | 0.00003                                           | 0.00275                                          | 0.00009                                          | 17.5                                             | 0.5                                               | 1                 |
| 12060711b | 08c   | 41                  | 33033               | 6624               | 5.0  | 0.00085                                           | 0.00003                                           | 0.00281                                          | 0.00009                                          | 17.1                                             | 0.5                                               | 1                 |
| 15060711b | 09b   | 36                  | 31166               | 5053               | 6.2  | 0.00087                                           | 0.00003                                           | 0.00278                                          | 0.00009                                          | 17.6                                             | 0.5                                               | 1                 |
| 16060711b | 10b   | 38                  | 35171               | 4535               | 7.8  | 0.00087                                           | 0.00003                                           | 0.00276                                          | 0.00009                                          | 17.6                                             | 0.5                                               | 1                 |
| 17060711b | 11c   | 40                  | 32930               | 5451               | 6.0  | 0.00090                                           | 0.00003                                           | 0.00281                                          | 0.00009                                          | 18.3                                             | 0.6                                               | 1                 |
| 18060711b | 12c   | 37                  | 34032               | 4326               | 7.9  | 0.00087                                           | 0.00003                                           | 0.00280                                          | 0.00009                                          | 17.7                                             | 0.5                                               | 1                 |
| 21060711b | 15c   | 47                  | 38268               | 6437               | 5.9  | 0.00089                                           | 0.00003                                           | 0.00278                                          | 0.00009                                          | 18.0                                             | 0.6                                               | 1                 |
| 22060711b | 16c   | 43                  | 32454               | 7183               | 4.5  | 0.00090                                           | 0.00003                                           | 0.00268                                          | 0.00009                                          | 18.2                                             | 0.6                                               | 1                 |
| 25060711b | 17b   | 44                  | 40047               | 5444               | 7.4  | 0.00086                                           | 0.00003                                           | 0.00276                                          | 0.00012                                          | 17.3                                             | 0.6                                               | 1                 |
| 26060711b | 18b   | 46                  | 39430               | 6125               | 6.4  | 0.00088                                           | 0.00003                                           | 0.00285                                          | 0.00009                                          | 17.7                                             | 0.5                                               | 1                 |
| 27060711b | 19c   | 46                  | 47085               | 3507               | 13.4 | 0.00088                                           | 0.00003                                           | 0.00280                                          | 0.00009                                          | 17.7                                             | 0.5                                               | 1                 |
| 28060711b | 20b   | 36                  | 33674               | 4492               | 7.5  | 0.00085                                           | 0.00003                                           | 0.00270                                          | 0.00009                                          | 17.1                                             | 0.5                                               | 1                 |
| 29060711b | 21c   | 41                  | 36037               | 5906               | 6.1  | 0.00087                                           | 0.00003                                           | 0.00273                                          | 0.00009                                          | 17.5                                             | 0.5                                               | 1                 |
| 30060711b | 22c   | 41                  | 37427               | 4873               | 7.7  | 0.00088                                           | 0.00003                                           | 0.00274                                          | 0.00009                                          | 17.7                                             | 0.5                                               | 1                 |
| 31060711b | 23c   | 61                  | 54498               | 7650               | 7.1  | 0.00088                                           | 0.00003                                           | 0.00276                                          | 0.00009                                          | 17.8                                             | 0.5                                               | 1                 |

**Table A3: T11N10 zircons**

| File#     | Spot# | Pb ppm <sup>1</sup> | Th ppm <sup>1</sup> | U ppm <sup>1</sup> | Th/U  | <sup>207</sup> Pb/ <sup>235</sup> U <sup>2</sup> | 2 σ error<br><sup>207</sup> Pb/ <sup>235</sup> U | <sup>206</sup> Pb/ <sup>238</sup> U <sup>2</sup> | 2 σ error<br><sup>206</sup> Pb/ <sup>238</sup> U | Age (Ma)<br><sup>206</sup> Pb/ <sup>238</sup> U | 2 σ error<br><sup>206</sup> Pb/ <sup>238</sup> U | Age<br>population <sup>a</sup> |
|-----------|-------|---------------------|---------------------|--------------------|-------|--------------------------------------------------|--------------------------------------------------|--------------------------------------------------|--------------------------------------------------|-------------------------------------------------|--------------------------------------------------|--------------------------------|
| 05300811d | 01b   | 7,8                 | 41                  | 2786               | 0,015 | 0,01998                                          | 0,00070                                          | 0,00304                                          | 0,00006                                          | 19,6                                            | 0,4                                              | 1                              |
| 06300811d | 02b   | 8,6                 | 25                  | 2999               | 0,008 | 0,02006                                          | 0,00054                                          | 0,00312                                          | 0,00006                                          | 20,1                                            | 0,4                                              | 1                              |
| 07300811d | 03b   | 11                  | 19                  | 4127               | 0,005 | 0,02007                                          | 0,00066                                          | 0,00304                                          | 0,00006                                          | 19,6                                            | 0,4                                              | 1                              |
| 08300811d | 04.1b | 6,5                 | 31                  | 2292               | 0,014 | 0,02032                                          | 0,00070                                          | 0,00307                                          | 0,00006                                          | 19,7                                            | 0,4                                              | 1                              |
| 09300811d | 04.2c | 10                  | 11                  | 2880               | 0,004 | 0,02573                                          | 0,00068                                          | 0,00397                                          | 0,00008                                          | 25,5                                            | 0,5                                              | 2                              |
| 10300811d | 05b   | 8,5                 | 32                  | 3025               | 0,010 | 0,01991                                          | 0,00056                                          | 0,00305                                          | 0,00006                                          | 19,6                                            | 0,4                                              | 1                              |
| 11300811d | 06b   | 10                  | 24                  | 3378               | 0,007 | 0,02025                                          | 0,00058                                          | 0,00316                                          | 0,00006                                          | 20,3                                            | 0,4                                              | 1                              |
| 12300811d | 07b   | 5,5                 | 25                  | 2002               | 0,012 | 0,02007                                          | 0,00066                                          | 0,00300                                          | 0,00006                                          | 19,3                                            | 0,4                                              | 1                              |
| 15300811d | 08b   | 5,0                 | 22                  | 1819               | 0,012 | 0,01946                                          | 0,00072                                          | 0,00296                                          | 0,00006                                          | 19,0                                            | 0,4                                              | 1                              |
| 16300811d | 09b   | 6,3                 | 19                  | 2312               | 0,008 | 0,01894                                          | 0,00082                                          | 0,00293                                          | 0,00006                                          | 18,9                                            | 0,4                                              | 1                              |
| 17300811d | 10b   | 7,1                 | 29                  | 2581               | 0,011 | 0,01960                                          | 0,00056                                          | 0,00298                                          | 0,00006                                          | 19,2                                            | 0,4                                              | 1                              |
| 18300811d | 11b   | 4,8                 | 18                  | 1707               | 0,011 | 0,02042                                          | 0,00106                                          | 0,00295                                          | 0,00006                                          | 19,0                                            | 0,4                                              | 1                              |
| 19300811d | 12b   | 11                  | 73                  | 4212               | 0,017 | 0,02137                                          | 0,00066                                          | 0,00290                                          | 0,00006                                          | 18,6                                            | 0,4                                              | 1                              |
| 20300811d | 13.1b | 6,3                 | 34                  | 2292               | 0,015 | 0,02118                                          | 0,00068                                          | 0,00292                                          | 0,00006                                          | 18,8                                            | 0,4                                              | 1                              |
| 21300811d | 13.2c | 16                  | 17                  | 4128               | 0,004 | 0,02650                                          | 0,00070                                          | 0,00411                                          | 0,00008                                          | 26,4                                            | 0,5                                              | 2                              |
| 22300811d | 14b   | 3,7                 | 16                  | 1287               | 0,012 | 0,02326                                          | 0,00092                                          | 0,00300                                          | 0,00006                                          | 19,3                                            | 0,4                                              | 1                              |
| 25300811d | 15.1b | 5,8                 | 27                  | 2111               | 0,013 | 0,02154                                          | 0,00070                                          | 0,00290                                          | 0,00006                                          | 18,7                                            | 0,4                                              | 1                              |
| 26300811d | 15.2c | 18                  | 24                  | 4802               | 0,005 | 0,02651                                          | 0,00070                                          | 0,00405                                          | 0,00008                                          | 26,0                                            | 0,5                                              | 2                              |
| 29300811d | 18.1b | 11                  | 65                  | 4221               | 0,015 | 0,01924                                          | 0,00060                                          | 0,00290                                          | 0,00006                                          | 18,7                                            | 0,4                                              | 1                              |
| 30300811d | 18.2c | 4,4                 | 2,7                 | 1008               | 0,003 | 0,03041                                          | 0,00160                                          | 0,00478                                          | 0,00010                                          | 30,8                                            | 0,7                                              | 3                              |

a: not taken into account in the age calculation when italicized (see text for details)

**Table A4: T11N11 monazites**

| File#     | Spot# | Pb ppm <sup>1</sup> | Th ppm <sup>1</sup> | U ppm <sup>1</sup> | Th/U | <sup>208</sup> Pb/ <sup>232</sup> Th <sup>2</sup> | 2 σ error<br><sup>208</sup> Pb/ <sup>232</sup> Th | <sup>206</sup> Pb/ <sup>238</sup> U <sup>2</sup> | 2 σ error<br><sup>206</sup> Pb/ <sup>238</sup> U | Age (Ma)<br><sup>208</sup> Pb/ <sup>232</sup> Th | 2 σ error<br><sup>208</sup> Pb/ <sup>232</sup> Th | Age<br>population |
|-----------|-------|---------------------|---------------------|--------------------|------|---------------------------------------------------|---------------------------------------------------|--------------------------------------------------|--------------------------------------------------|--------------------------------------------------|---------------------------------------------------|-------------------|
| 05290811b | 01c   | 42                  | 48556               | 2628               | 18.5 | 0.00080                                           | 0.00002                                           | 0.00278                                          | 0.00008                                          | 16.2                                             | 0.4                                               | 1                 |
| 06290811b | 02b   | 54                  | 48010               | 7008               | 6.9  | 0.00084                                           | 0.00002                                           | 0.00279                                          | 0.00008                                          | 16.9                                             | 0.4                                               | 1                 |
| 08290811b | 03.2b | 51                  | 43381               | 8370               | 5.2  | 0.00082                                           | 0.00002                                           | 0.00262                                          | 0.00006                                          | 16.6                                             | 0.4                                               | 1                 |
| 09290811b | 04c   | 41                  | 47166               | 3147               | 15.0 | 0.00080                                           | 0.00002                                           | 0.00261                                          | 0.00008                                          | 16.1                                             | 0.4                                               | 1                 |
| 10290811b | 05c   | 32                  | 35015               | 2863               | 12.2 | 0.00080                                           | 0.00002                                           | 0.00263                                          | 0.00008                                          | 16.2                                             | 0.4                                               | 1                 |
| 11290811b | 06c   | 43                  | 43522               | 5305               | 8.2  | 0.00081                                           | 0.00002                                           | 0.00257                                          | 0.00006                                          | 16.4                                             | 0.4                                               | 1                 |
| 12290811b | 07c   | 40                  | 38422               | 2556               | 15.0 | 0.00097                                           | 0.00002                                           | 0.00311                                          | 0.00008                                          | 19.5                                             | 0.5                                               | 2                 |
| 16290811b | 08.2b | 32                  | 36931               | 2142               | 17.2 | 0.00080                                           | 0.00002                                           | 0.00279                                          | 0.00008                                          | 16.2                                             | 0.4                                               | 1                 |
| 17290811b | 09c   | 40                  | 36459               | 6622               | 5.5  | 0.00081                                           | 0.00002                                           | 0.00250                                          | 0.00006                                          | 16.4                                             | 0.4                                               | 1                 |
| 18290811b | 10c   | 49                  | 52296               | 4287               | 12.2 | 0.00081                                           | 0.00002                                           | 0.00271                                          | 0.00008                                          | 16.4                                             | 0.4                                               | 1                 |
| 19290811b | 11c   | 47                  | 42317               | 7645               | 5.5  | 0.00082                                           | 0.00002                                           | 0.00252                                          | 0.00006                                          | 16.5                                             | 0.4                                               | 1                 |
| 20290811b | 12c   | 40                  | 41574               | 4313               | 9.6  | 0.00082                                           | 0.00002                                           | 0.00258                                          | 0.00006                                          | 16.6                                             | 0.4                                               | 1                 |
| 21290811b | 13c   | 46                  | 46913               | 4559               | 10.3 | 0.00084                                           | 0.00002                                           | 0.00273                                          | 0.00008                                          | 16.9                                             | 0.4                                               | 1                 |
| 25290811b | 15c   | 56                  | 51185               | 7970               | 6.4  | 0.00083                                           | 0.00002                                           | 0.00262                                          | 0.00006                                          | 16.7                                             | 0.4                                               | 1                 |
| 26290811b | 16c   | 46                  | 47506               | 4845               | 9.8  | 0.00082                                           | 0.00002                                           | 0.00259                                          | 0.00006                                          | 16.5                                             | 0.4                                               | 1                 |
| 27290811b | 17c   | 70                  | 57302               | 6464               | 8.9  | 0.00098                                           | 0.00002                                           | 0.00318                                          | 0.00008                                          | 19.9                                             | 0.5                                               | 2                 |
| 28290811b | 18.1c | 170                 | 110679              | 38665              | 2.9  | 0.00082                                           | 0.00002                                           | 0.00273                                          | 0.00006                                          | 16.5                                             | 0.4                                               | 1                 |
| 29290811b | 18.2b | 126                 | 82373               | 27750              | 3.0  | 0.00084                                           | 0.00002                                           | 0.00282                                          | 0.00006                                          | 17.1                                             | 0.4                                               | 1                 |
| 31290811b | 20b   | 41                  | 39546               | 5632               | 7.0  | 0.00081                                           | 0.00002                                           | 0.00258                                          | 0.00006                                          | 16.3                                             | 0.4                                               | 1                 |
| 32290811b | 21c   | 33                  | 39051               | 2240               | 17.4 | 0.00080                                           | 0.00002                                           | 0.00271                                          | 0.00008                                          | 16.1                                             | 0.4                                               | 1                 |

**Table A5: T11N41 monazites**

| File#     | Spot#  | Pb ppm <sup>1</sup> | Th ppm <sup>1</sup> | U ppm <sup>1</sup> | Th/U | <sup>208</sup> Pb/ <sup>232</sup> Th <sup>2</sup> | 2 σ error<br><sup>208</sup> Pb/ <sup>232</sup> Th | <sup>206</sup> Pb/ <sup>238</sup> U <sup>2</sup> | 2 σ error<br><sup>206</sup> Pb/ <sup>238</sup> U | Age (Ma)<br><sup>208</sup> Pb/ <sup>232</sup> Th | 2 σ error<br><sup>208</sup> Pb/ <sup>232</sup> Th | Age<br>population |
|-----------|--------|---------------------|---------------------|--------------------|------|---------------------------------------------------|---------------------------------------------------|--------------------------------------------------|--------------------------------------------------|--------------------------------------------------|---------------------------------------------------|-------------------|
| 06290811c | 02.1c  | 132                 | 66903               | 10961              | 6.1  | 0.00146                                           | 0.00004                                           | 0.00484                                          | 0.00012                                          | 29.5                                             | 0.6                                               | 2                 |
| 07290811c | 03c    | 79                  | 59488               | 8805               | 6.8  | 0.00102                                           | 0.00002                                           | 0.00330                                          | 0.00008                                          | 20.6                                             | 0.5                                               | 1                 |
| 08290811c | 4.1c   | 142                 | 69672               | 13343              | 5.2  | 0.00145                                           | 0.00004                                           | 0.00457                                          | 0.00010                                          | 29.3                                             | 0.6                                               | 2                 |
| 09290811c | 5.1b   | 155                 | 69498               | 17859              | 3.9  | 0.00145                                           | 0.00004                                           | 0.00444                                          | 0.00010                                          | 29.3                                             | 0.6                                               | 2                 |
| 10290811c | 06b    | 60                  | 48627               | 6881               | 7.1  | 0.00096                                           | 0.00002                                           | 0.00325                                          | 0.00010                                          | 19.4                                             | 0.5                                               | 1                 |
| 11290811c | 07b    | 71                  | 57169               | 7103               | 8.0  | 0.00101                                           | 0.00002                                           | 0.00319                                          | 0.00008                                          | 20.4                                             | 0.4                                               | 1                 |
| 12290811c | 08b    | 96                  | 51593               | 17162              | 3.0  | 0.00107                                           | 0.00002                                           | 0.00335                                          | 0.00008                                          | 21.6                                             | 0.5                                               | 1                 |
| 15290811c | 09b    | 82                  | 53765               | 11925              | 4.5  | 0.00104                                           | 0.00002                                           | 0.00321                                          | 0.00008                                          | 21.1                                             | 0.5                                               | 1                 |
| 16290811c | 10.1b1 | 119                 | 68654               | 8572               | 8.0  | 0.00140                                           | 0.00004                                           | 0.00445                                          | 0.00010                                          | 28.3                                             | 0.6                                               | 2                 |
| 17290811c | 11b    | 72                  | 47103               | 10463              | 4.5  | 0.00104                                           | 0.00002                                           | 0.00321                                          | 0.00008                                          | 21.0                                             | 0.5                                               | 1                 |
| 18290811c | 12b    | 76                  | 58181               | 8214               | 7.1  | 0.00103                                           | 0.00002                                           | 0.00330                                          | 0.00008                                          | 20.8                                             | 0.5                                               | 1                 |
| 19290811c | 13b    | 81                  | 52869               | 12804              | 4.1  | 0.00102                                           | 0.00002                                           | 0.00319                                          | 0.00008                                          | 20.5                                             | 0.5                                               | 1                 |
| 20290811c | 14.1b  | 162                 | 75011               | 18233              | 4.1  | 0.00143                                           | 0.00004                                           | 0.00446                                          | 0.00010                                          | 28.9                                             | 0.6                                               | 2                 |
| 21290811c | 15b    | 78                  | 59990               | 8814               | 6.8  | 0.00100                                           | 0.00002                                           | 0.00332                                          | 0.00008                                          | 20.2                                             | 0.4                                               | 1                 |
| 22290811c | 16b    | 69                  | 57976               | 6625               | 8.8  | 0.00097                                           | 0.00002                                           | 0.00327                                          | 0.00008                                          | 19.6                                             | 0.4                                               | 1                 |
| 25290811c | 17b    | 64                  | 38281               | 11095              | 3.5  | 0.00102                                           | 0.00002                                           | 0.00322                                          | 0.00008                                          | 20.6                                             | 0.5                                               | 1                 |
| 26290811c | 18b    | 64                  | 57396               | 5548               | 10.3 | 0.00095                                           | 0.00002                                           | 0.00304                                          | 0.00008                                          | 19.3                                             | 0.4                                               | 1                 |
| 27290811c | 19c    | 81                  | 53920               | 12887              | 4.2  | 0.00100                                           | 0.00002                                           | 0.00315                                          | 0.00008                                          | 20.1                                             | 0.4                                               | 1                 |
| 28290811c | 20b    | 63                  | 57758               | 5049               | 11.4 | 0.00095                                           | 0.00002                                           | 0.00306                                          | 0.00008                                          | 19.3                                             | 0.4                                               | 1                 |
| 29290811c | 21.1c  | 148                 | 93688               | 8968               | 10.4 | 0.00142                                           | 0.00004                                           | 0.00468                                          | 0.00010                                          | 28.8                                             | 0.6                                               | 2                 |
| 30290811c | 22b    | 86                  | 65161               | 10651              | 6.1  | 0.00103                                           | 0.00002                                           | 0.00329                                          | 0.00008                                          | 20.9                                             | 0.5                                               | 1                 |
| 31290811c | 23b    | 78                  | 51636               | 13221              | 3.9  | 0.00102                                           | 0.00002                                           | 0.00313                                          | 0.00008                                          | 20.5                                             | 0.4                                               | 1                 |
| 32290811c | 24b    | 89                  | 59831               | 14095              | 4.2  | 0.00103                                           | 0.00002                                           | 0.00326                                          | 0.00008                                          | 20.8                                             | 0.5                                               | 1                 |
| 41290811e | 2.2b   | 127                 | 61556               | 10177              | 6.0  | 0.00151                                           | 0.00004                                           | 0.00509                                          | 0.00014                                          | 30.5                                             | 0.7                                               | 2                 |
| 42290811e | 4.2c   | 131                 | 71086               | 15274              | 4.7  | 0.00126                                           | 0.00004                                           | 0.00408                                          | 0.00012                                          | 25.5                                             | 0.6                                               | 3                 |
| 43290811e | 04.3b2 | 113                 | 64336               | 10087              | 6.4  | 0.00134                                           | 0.00004                                           | 0.00428                                          | 0.00010                                          | 27.1                                             | 0.6                                               | 3                 |
| 46290811e | 5.2c   | 147                 | 68212               | 16815              | 4.1  | 0.00142                                           | 0.00004                                           | 0.00436                                          | 0.00010                                          | 28.7                                             | 0.7                                               | 2                 |
| 47290811e | 10.2c  | 132                 | 77158               | 9397               | 8.2  | 0.00140                                           | 0.00004                                           | 0.00453                                          | 0.00012                                          | 28.3                                             | 0.6                                               | 2                 |
| 48290811e | 10.3b2 | 116                 | 67984               | 8092               | 8.4  | 0.00139                                           | 0.00004                                           | 0.00461                                          | 0.00012                                          | 28.1                                             | 0.6                                               | 2                 |
| 49290811e | 14.2c  | 72                  | 58994               | 8488               | 7.0  | 0.00096                                           | 0.00002                                           | 0.00300                                          | 0.00008                                          | 19.4                                             | 0.5                                               | 1                 |
| 50290811e | 21.2b  | 70                  | 58488               | 7476               | 7.8  | 0.00096                                           | 0.00002                                           | 0.00313                                          | 0.00008                                          | 19.4                                             | 0.5                                               | 1                 |

**Table A6: T11N41 zircons**

| File#     | Spot#  | Pb ppm <sup>1</sup> | Th ppm <sup>1</sup> | U ppm <sup>1</sup> | Th/U  | <sup>207</sup> Pb/ <sup>235</sup> U <sup>2</sup> | 2 σ error<br><sup>207</sup> Pb/ <sup>235</sup> U | <sup>206</sup> Pb/ <sup>238</sup> U <sup>2</sup> | 2 σ error<br><sup>206</sup> Pb/ <sup>238</sup> U | Age (Ma)<br><sup>206</sup> Pb/ <sup>238</sup> U | 2 σ error<br><sup>206</sup> Pb/ <sup>238</sup> U | Age<br>population <sup>a</sup> |
|-----------|--------|---------------------|---------------------|--------------------|-------|--------------------------------------------------|--------------------------------------------------|--------------------------------------------------|--------------------------------------------------|-------------------------------------------------|--------------------------------------------------|--------------------------------|
| 05300811e | 01.1b  | 4,7                 | 14                  | 1571               | 0,009 | 0,02028                                          | 0,00096                                          | 0,00318                                          | 0,00006                                          | 20,5                                            | 0,4                                              | 1                              |
| 06300811e | 01.2c  | 23                  | 86                  | 7921               | 0,011 | 0,02111                                          | 0,00076                                          | 0,00323                                          | 0,00006                                          | 20,8                                            | 0,4                                              | 1                              |
| 07300811e | 02b    | 2,1                 | 7,1                 | 684                | 0,010 | 0,02017                                          | 0,00176                                          | 0,00317                                          | 0,00008                                          | 20,4                                            | 0,5                                              | 1                              |
| 08300811e | 03b    | 6,6                 | 20                  | 2258               | 0,009 | 0,02186                                          | 0,00124                                          | 0,00317                                          | 0,00008                                          | 20,4                                            | 0,5                                              | 1                              |
| 09300811e | 04.1b  | 4,7                 | 11                  | 1534               | 0,007 | 0,02301                                          | 0,00082                                          | 0,00320                                          | 0,00006                                          | 20,6                                            | 0,4                                              | 1                              |
| 10300811e | 04.2c2 | 5,8                 | 16                  | 1897               | 0,009 | 0,02161                                          | 0,00140                                          | 0,00328                                          | 0,00008                                          | 21,1                                            | 0,5                                              | 1                              |
| 11300811e | 04.3c1 | 19                  | 30                  | 4493               | 0,007 | 0,02994                                          | 0,00074                                          | 0,00455                                          | 0,00010                                          | 29,3                                            | 0,6                                              | 2                              |
| 12300811e | 05b    | 6,5                 | 12                  | 1814               | 0,007 | 0,02540                                          | 0,00076                                          | 0,00388                                          | 0,00008                                          | 25,0                                            | 0,5                                              | 3                              |
| 15300811e | 06b    | 8,7                 | 26                  | 2771               | 0,009 | 0,02357                                          | 0,00098                                          | 0,00334                                          | 0,00008                                          | 21,5                                            | 0,5                                              | 1                              |
| 16300811e | 07b    | 3,6                 | 6,9                 | 1103               | 0,006 | 0,02455                                          | 0,00092                                          | 0,00325                                          | 0,00006                                          | 20,9                                            | 0,4                                              | 1                              |
| 17300811e | 08c    | 30                  | 61                  | 7152               | 0,009 | 0,02932                                          | 0,00070                                          | 0,00455                                          | 0,00010                                          | 29,2                                            | 0,6                                              | 2                              |
| 18300811e | 09.1b  | 5,8                 | 15                  | 1885               | 0,008 | 0,02081                                          | 0,00082                                          | 0,00327                                          | 0,00006                                          | 21,1                                            | 0,4                                              | 1                              |
| 19300811e | 09.2cb | 3,6                 | 5,5                 | 894                | 0,006 | 0,02700                                          | 0,00148                                          | 0,00410                                          | 0,00010                                          | 26,4                                            | 0,6                                              | 3                              |
| 20300811e | 9.3c   | 13                  | 16                  | 3210               | 0,005 | 0,02889                                          | 0,00080                                          | 0,00446                                          | 0,00010                                          | 28,7                                            | 0,6                                              | 2                              |
| 22300811e | 10.2c  | 31                  | 127                 | 7549               | 0,017 | 0,02997                                          | 0,00074                                          | 0,00453                                          | 0,00010                                          | 29,2                                            | 0,6                                              | 2                              |
| 25300811e | 11.1b  | 3,8                 | 8,4                 | 1234               | 0,007 | 0,02173                                          | 0,00078                                          | 0,00320                                          | 0,00006                                          | 20,6                                            | 0,4                                              | 1                              |
| 26300811e | 11.2c  | 26                  | 43                  | 6227               | 0,007 | 0,03237                                          | 0,00078                                          | 0,00454                                          | 0,00010                                          | 29,2                                            | 0,6                                              | 2                              |
| 27300811e | 12.1b1 | 2,2                 | 5,7                 | 641                | 0,009 | 0,02461                                          | 0,00144                                          | 0,00320                                          | 0,00008                                          | 20,6                                            | 0,5                                              | 1                              |
| 28300811e | 12.2cb | 26                  | 46                  | 6206               | 0,007 | 0,02915                                          | 0,00080                                          | 0,00454                                          | 0,00010                                          | 29,2                                            | 0,6                                              | 2                              |
| 29300811e | 12.3c  | 15                  | 35                  | 3472               | 0,010 | 0,03031                                          | 0,00084                                          | 0,00462                                          | 0,00010                                          | 29,7                                            | 0,6                                              | 2                              |
| 30300811e | 13.1b  | 3,2                 | 8,0                 | 1059               | 0,008 | 0,02176                                          | 0,00090                                          | 0,00318                                          | 0,00006                                          | 20,4                                            | 0,4                                              | 1                              |
| 31300811e | 13.2c  | 34                  | 133                 | 9701               | 0,014 | 0,02533                                          | 0,00062                                          | 0,00388                                          | 0,00008                                          | 25,0                                            | 0,5                                              | 3                              |
| 32300811e | 14b    | 4,9                 | 12                  | 1567               | 0,008 | 0,02260                                          | 0,00082                                          | 0,00327                                          | 0,00006                                          | 21,0                                            | 0,4                                              | 1                              |

a: not taken into account in the age calculation when italicized (see text for details)

**Table A7: T11N42 monazites**

| File#     | Spot# | Pb ppm <sup>1</sup> | Th ppm <sup>1</sup> | U ppm <sup>1</sup> | Th/U | <sup>208</sup> Pb/ <sup>232</sup> Th <sup>2</sup> | 2 $\sigma$ error<br><sup>208</sup> Pb/ <sup>232</sup> Th | <sup>206</sup> Pb/ <sup>238</sup> U <sup>2</sup> | 2 $\sigma$ error<br><sup>206</sup> Pb/ <sup>238</sup> U | Age (Ma)<br><sup>208</sup> Pb/ <sup>232</sup> Th | 2 $\sigma$ error<br><sup>208</sup> Pb/ <sup>232</sup> Th | Age<br>population |
|-----------|-------|---------------------|---------------------|--------------------|------|---------------------------------------------------|----------------------------------------------------------|--------------------------------------------------|---------------------------------------------------------|--------------------------------------------------|----------------------------------------------------------|-------------------|
| 06290811d | 2b    | 58                  | 34692               | 16948              | 2.0  | 0.00082                                           | 0.00002                                                  | 0.00241                                          | 0.00006                                                 | 16.6                                             | 0.4                                                      | 1                 |
| 07290811d | 3b    | 114                 | 37546               | 47151              | 0.8  | 0.00083                                           | 0.00002                                                  | 0.00234                                          | 0.00006                                                 | 16.7                                             | 0.4                                                      | 1                 |
| 10290811d | 6b    | 89                  | 54754               | 24655              | 2.2  | 0.00080                                           | 0.00002                                                  | 0.00247                                          | 0.00006                                                 | 16.2                                             | 0.4                                                      | 1                 |
| 12290811d | 8b    | 78                  | 58356               | 17688              | 3.3  | 0.00081                                           | 0.00002                                                  | 0.00248                                          | 0.00006                                                 | 16.4                                             | 0.4                                                      | 1                 |
| 15290811d | 9b    | 70                  | 57656               | 11611              | 5.0  | 0.00083                                           | 0.00002                                                  | 0.00274                                          | 0.00008                                                 | 16.8                                             | 0.4                                                      | 1                 |
| 16290811d | 10b   | 86                  | 71702               | 15511              | 4.6  | 0.00083                                           | 0.00002                                                  | 0.00255                                          | 0.00006                                                 | 16.8                                             | 0.4                                                      | 1                 |
| 18290811d | 12b   | 194                 | 38752               | 87253              | 0.4  | 0.00082                                           | 0.00002                                                  | 0.00240                                          | 0.00006                                                 | 16.6                                             | 0.4                                                      | 1                 |
| 19290811d | 13b   | 124                 | 52883               | 42068              | 1.3  | 0.00082                                           | 0.00002                                                  | 0.00253                                          | 0.00006                                                 | 16.6                                             | 0.4                                                      | 1                 |
| 20290811d | 14c   | 95                  | 61475               | 24180              | 2.5  | 0.00081                                           | 0.00002                                                  | 0.00257                                          | 0.00006                                                 | 16.4                                             | 0.4                                                      | 1                 |
| 21290811d | 15c   | 75                  | 60596               | 14805              | 4.1  | 0.00082                                           | 0.00002                                                  | 0.00248                                          | 0.00006                                                 | 16.5                                             | 0.4                                                      | 1                 |
| 25290811d | 17b   | 81                  | 56219               | 18929              | 3.0  | 0.00081                                           | 0.00002                                                  | 0.00253                                          | 0.00006                                                 | 16.4                                             | 0.4                                                      | 1                 |
| 26290811d | 18b   | 172                 | 58295               | 65786              | 0.9  | 0.00083                                           | 0.00002                                                  | 0.00244                                          | 0.00006                                                 | 16.7                                             | 0.4                                                      | 1                 |
| 29290811d | 21b   | 97                  | 67116               | 25060              | 2.7  | 0.00080                                           | 0.00002                                                  | 0.00241                                          | 0.00006                                                 | 16.2                                             | 0.4                                                      | 1                 |
| 30290811d | 22b   | 84                  | 56910               | 21045              | 2.7  | 0.00081                                           | 0.00002                                                  | 0.00242                                          | 0.00006                                                 | 16.4                                             | 0.4                                                      | 1                 |

**Table A8: T11N44 monazites**

| File#     | Spot# | Pb ppm <sup>1</sup> | Th ppm <sup>1</sup> | U ppm <sup>1</sup> | Th/U | <sup>208</sup> Pb/ <sup>232</sup> Th <sup>2</sup> | 2 σ error<br><sup>208</sup> Pb/ <sup>232</sup> Th | <sup>206</sup> Pb/ <sup>238</sup> U <sup>2</sup> | 2 σ error<br><sup>206</sup> Pb/ <sup>238</sup> U | Age (Ma)<br><sup>208</sup> Pb/ <sup>232</sup> Th | 2 σ error<br><sup>208</sup> Pb/ <sup>232</sup> Th | Age<br>population |
|-----------|-------|---------------------|---------------------|--------------------|------|---------------------------------------------------|---------------------------------------------------|--------------------------------------------------|--------------------------------------------------|--------------------------------------------------|---------------------------------------------------|-------------------|
| 05060711e | 01b   | 122                 | 75570               | 13558              | 5.6  | 0.00115                                           | 0.00003                                           | 0.00391                                          | 0.00012                                          | 23.3                                             | 0.7                                               | 1                 |
| 06060711e | 02c   | 110                 | 69288               | 11063              | 6.3  | 0.00118                                           | 0.00003                                           | 0.00398                                          | 0.00012                                          | 23.8                                             | 0.7                                               | 1                 |
| 07060711e | 03b   | 122                 | 71964               | 13839              | 5.2  | 0.00118                                           | 0.00003                                           | 0.00400                                          | 0.00012                                          | 23.8                                             | 0.7                                               | 1                 |
| 08060711e | 04c   | 103                 | 73793               | 9641               | 7.7  | 0.00111                                           | 0.00003                                           | 0.00361                                          | 0.00012                                          | 22.5                                             | 0.7                                               | 1                 |
| 09060711e | 05b   | 85                  | 67713               | 8186               | 8.3  | 0.00102                                           | 0.00003                                           | 0.00323                                          | 0.00012                                          | 20.6                                             | 0.6                                               | 2                 |
| 10060711e | 06.1c | 129                 | 77793               | 13728              | 5.7  | 0.00119                                           | 0.00003                                           | 0.00397                                          | 0.00012                                          | 24.0                                             | 0.7                                               | 1                 |
| 11060711e | 06.2b | 118                 | 71349               | 12758              | 5.6  | 0.00118                                           | 0.00003                                           | 0.00392                                          | 0.00012                                          | 23.9                                             | 0.7                                               | 1                 |
| 12060711e | 07c   | 105                 | 64258               | 12051              | 5.3  | 0.00115                                           | 0.00003                                           | 0.00384                                          | 0.00012                                          | 23.2                                             | 0.7                                               | 1                 |
| 15060711e | 08.1c | 147                 | 89069               | 16607              | 5.4  | 0.00116                                           | 0.00003                                           | 0.00393                                          | 0.00012                                          | 23.5                                             | 0.7                                               | 1                 |
| 17060711e | 08.3b | 88                  | 58619               | 9756               | 6.0  | 0.00111                                           | 0.00003                                           | 0.00356                                          | 0.00012                                          | 22.4                                             | 0.7                                               | 1                 |
| 18060711e | 09c   | 77                  | 59494               | 5575               | 10.7 | 0.00112                                           | 0.00003                                           | 0.00355                                          | 0.00012                                          | 22.6                                             | 0.7                                               | 1                 |
| 19060711e | 10c   | 131                 | 78153               | 15138              | 5.2  | 0.00117                                           | 0.00003                                           | 0.00390                                          | 0.00012                                          | 23.7                                             | 0.7                                               | 1                 |
| 20060711e | 11c   | 132                 | 81174               | 14346              | 5.7  | 0.00118                                           | 0.00003                                           | 0.00393                                          | 0.00012                                          | 23.8                                             | 0.7                                               | 1                 |
| 21060711e | 12b   | 145                 | 78330               | 20295              | 3.9  | 0.00117                                           | 0.00003                                           | 0.00377                                          | 0.00015                                          | 23.7                                             | 0.8                                               | 1                 |
| 22060711e | 13b   | 90                  | 65822               | 7954               | 8.3  | 0.00111                                           | 0.00003                                           | 0.00367                                          | 0.00012                                          | 22.4                                             | 0.7                                               | 1                 |
| 25060711e | 14c   | 92                  | 63730               | 7974               | 8.0  | 0.00115                                           | 0.00003                                           | 0.00378                                          | 0.00012                                          | 23.3                                             | 0.7                                               | 1                 |
| 26060711e | 15b   | 123                 | 73893               | 13622              | 5.4  | 0.00118                                           | 0.00003                                           | 0.00394                                          | 0.00012                                          | 23.8                                             | 0.7                                               | 1                 |
| 27060711e | 16c   | 81                  | 61014               | 6121               | 10.0 | 0.00114                                           | 0.00003                                           | 0.00354                                          | 0.00012                                          | 23.0                                             | 0.7                                               | 1                 |
| 28060711e | 17b   | 114                 | 68149               | 13023              | 5.2  | 0.00117                                           | 0.00003                                           | 0.00390                                          | 0.00012                                          | 23.6                                             | 0.7                                               | 1                 |
| 29060711e | 18c   | 86                  | 64020               | 6230               | 10.3 | 0.00115                                           | 0.00003                                           | 0.00362                                          | 0.00012                                          | 23.3                                             | 0.7                                               | 1                 |
| 30060711e | 19c   | 123                 | 73925               | 14117              | 5.2  | 0.00117                                           | 0.00003                                           | 0.00389                                          | 0.00012                                          | 23.7                                             | 0.7                                               | 1                 |
| 31060711e | 20c   | 77                  | 61141               | 9071               | 6.7  | 0.00098                                           | 0.00003                                           | 0.00310                                          | 0.00009                                          | 19.8                                             | 0.6                                               | 2                 |
| 32060711e | 21c   | 92                  | 59557               | 8815               | 6.8  | 0.00118                                           | 0.00003                                           | 0.00389                                          | 0.00012                                          | 23.7                                             | 0.7                                               | 1                 |



**Table A9: T11N45 monazites**

| File#     | Spot# | Pb ppm <sup>1</sup> | Th ppm <sup>1</sup> | U ppm <sup>1</sup> | Th/U | <sup>208</sup> Pb/ <sup>232</sup> Th <sup>2</sup> | 2 σ error<br><sup>208</sup> Pb/ <sup>232</sup> Th | <sup>206</sup> Pb/ <sup>238</sup> U <sup>2</sup> | 2 σ error<br><sup>206</sup> Pb/ <sup>238</sup> U | Age (Ma)<br><sup>208</sup> Pb/ <sup>232</sup> Th | 2 σ error<br><sup>208</sup> Pb/ <sup>232</sup> Th | Age<br>population |
|-----------|-------|---------------------|---------------------|--------------------|------|---------------------------------------------------|---------------------------------------------------|--------------------------------------------------|--------------------------------------------------|--------------------------------------------------|---------------------------------------------------|-------------------|
| 05070711c | 1c    | 138                 | 48270               | 50653              | 1.0  | 0.00083                                           | 0.00003                                           | 0.00251                                          | 0.00009                                          | 16.9                                             | 0.5                                               | 1                 |
| 06070711c | 2c    | 111                 | 33660               | 42931              | 0.8  | 0.00084                                           | 0.00003                                           | 0.00250                                          | 0.00009                                          | 16.9                                             | 0.5                                               | 1                 |
| 07070711c | 3c    | 80                  | 42949               | 22972              | 1.9  | 0.00084                                           | 0.00003                                           | 0.00258                                          | 0.00009                                          | 16.9                                             | 0.6                                               | 1                 |
| 08070711c | 4c    | 116                 | 45266               | 40866              | 1.1  | 0.00083                                           | 0.00003                                           | 0.00252                                          | 0.00009                                          | 16.8                                             | 0.5                                               | 1                 |
| 09070711c | 5c    | 70                  | 45799               | 17234              | 2.7  | 0.00084                                           | 0.00003                                           | 0.00254                                          | 0.00009                                          | 16.9                                             | 0.5                                               | 1                 |
| 10070711c | 6c    | 76                  | 43623               | 21534              | 2.0  | 0.00082                                           | 0.00003                                           | 0.00250                                          | 0.00009                                          | 16.6                                             | 0.6                                               | 1                 |
| 11070711c | 7b    | 84                  | 40416               | 26036              | 1.6  | 0.00083                                           | 0.00003                                           | 0.00256                                          | 0.00009                                          | 16.8                                             | 0.5                                               | 1                 |
| 12070711c | 8b    | 94                  | 39670               | 31517              | 1.3  | 0.00085                                           | 0.00003                                           | 0.00249                                          | 0.00009                                          | 17.2                                             | 0.6                                               | 1                 |
| 15070711c | 9c    | 86                  | 48565               | 24590              | 2.0  | 0.00082                                           | 0.00003                                           | 0.00251                                          | 0.00009                                          | 16.5                                             | 0.5                                               | 1                 |
| 16070711c | 10c   | 80                  | 49618               | 20648              | 2.4  | 0.00082                                           | 0.00003                                           | 0.00257                                          | 0.00009                                          | 16.6                                             | 0.5                                               | 1                 |
| 17070711c | 11c   | 71                  | 48784               | 15750              | 3.1  | 0.00083                                           | 0.00003                                           | 0.00260                                          | 0.00009                                          | 16.9                                             | 0.5                                               | 1                 |
| 18070711c | 12c   | 72                  | 56760               | 14249              | 4.0  | 0.00081                                           | 0.00003                                           | 0.00256                                          | 0.00009                                          | 16.3                                             | 0.5                                               | 1                 |
| 19070711c | 13c   | 96                  | 62913               | 22900              | 2.7  | 0.00083                                           | 0.00003                                           | 0.00259                                          | 0.00009                                          | 16.9                                             | 0.5                                               | 1                 |
| 20070711c | 14c   | 135                 | 60686               | 44821              | 1.4  | 0.00082                                           | 0.00003                                           | 0.00251                                          | 0.00009                                          | 16.6                                             | 0.5                                               | 1                 |
| 21070711c | 15c   | 58                  | 52407               | 8636               | 6.1  | 0.00083                                           | 0.00003                                           | 0.00262                                          | 0.00009                                          | 16.7                                             | 0.5                                               | 1                 |
| 22070711c | 16c   | 79                  | 43971               | 22864              | 1.9  | 0.00083                                           | 0.00003                                           | 0.00248                                          | 0.00009                                          | 16.8                                             | 0.6                                               | 1                 |
| 25070711c | 17c   | 72                  | 45800               | 18382              | 2.5  | 0.00084                                           | 0.00003                                           | 0.00251                                          | 0.00009                                          | 16.9                                             | 0.5                                               | 1                 |
| 26070711c | 18c   | 53                  | 50671               | 6680               | 7.6  | 0.00083                                           | 0.00003                                           | 0.00262                                          | 0.00009                                          | 16.7                                             | 0.5                                               | 1                 |
| 27070711c | 19c   | 88                  | 30334               | 31629              | 1.0  | 0.00086                                           | 0.00003                                           | 0.00252                                          | 0.00009                                          | 17.4                                             | 0.6                                               | 1                 |
| 28070711c | 20c   | 132                 | 56356               | 44018              | 1.3  | 0.00082                                           | 0.00003                                           | 0.00251                                          | 0.00009                                          | 16.6                                             | 0.6                                               | 1                 |
| 31070711c | 23b   | 105                 | 20837               | 44832              | 0.5  | 0.00088                                           | 0.00003                                           | 0.00246                                          | 0.00009                                          | 17.7                                             | 0.6                                               | 1                 |
| 32070711c | 24c   | 85                  | 47188               | 24188              | 2.0  | 0.00084                                           | 0.00003                                           | 0.00248                                          | 0.00009                                          | 17.0                                             | 0.5                                               | 1                 |
| 33070711c | 25c   | 85                  | 29239               | 31759              | 0.9  | 0.00085                                           | 0.00003                                           | 0.00242                                          | 0.00009                                          | 17.3                                             | 0.6                                               | 1                 |

**Table A10: T11N47 monazites**

| File#     | Spot# | Pb ppm <sup>1</sup> | Th ppm <sup>1</sup> | U ppm <sup>1</sup> | Th/U | <sup>208</sup> Pb/ <sup>232</sup> Th <sup>2</sup> | 2 σ error<br><sup>208</sup> Pb/ <sup>232</sup> Th | <sup>206</sup> Pb/ <sup>238</sup> U <sup>2</sup> | 2 σ error<br><sup>206</sup> Pb/ <sup>238</sup> U | Age (Ma)<br><sup>208</sup> Pb/ <sup>232</sup> Th | 2 σ error<br><sup>208</sup> Pb/ <sup>232</sup> Th | Age<br>population <sup>a</sup> |
|-----------|-------|---------------------|---------------------|--------------------|------|---------------------------------------------------|---------------------------------------------------|--------------------------------------------------|--------------------------------------------------|--------------------------------------------------|---------------------------------------------------|--------------------------------|
| 06290811e | 2b    | 92                  | 69962               | 7377               | 9,5  | 0,00110                                           | 0,00002                                           | 0,00355                                          | 0,00010                                          | 22,3                                             | 0,5                                               | 1                              |
| 08290811e | 4b    | 108                 | 71292               | 11561              | 6,2  | 0,00113                                           | 0,00002                                           | 0,00369                                          | 0,00010                                          | 22,9                                             | 0,5                                               | 1                              |
| 09290811e | 5b    | 84                  | 65806               | 5220               | 12,6 | 0,00113                                           | 0,00002                                           | 0,00363                                          | 0,00010                                          | 22,9                                             | 0,5                                               | 1                              |
| 10290811e | 6c    | 111                 | 75197               | 10388              | 7,2  | 0,00115                                           | 0,00002                                           | 0,00389                                          | 0,00010                                          | 23,2                                             | 0,5                                               | 1                              |
| 11290811e | 7b    | 171                 | 63486               | 36012              | 1,8  | 0,00115                                           | 0,00002                                           | 0,00367                                          | 0,00010                                          | 23,3                                             | 0,6                                               | 1                              |
| 12290811e | 8b    | 105                 | 81735               | 8498               | 9,6  | 0,00108                                           | 0,00002                                           | 0,00350                                          | 0,00010                                          | 21,8                                             | 0,5                                               | 1                              |
| 15290811e | 9b    | 95                  | 77241               | 7010               | 11,0 | 0,00105                                           | 0,00002                                           | 0,00368                                          | 0,00010                                          | 21,2                                             | 0,5                                               | 1                              |
| 16290811e | 10b   | 123                 | 78865               | 13628              | 5,8  | 0,00113                                           | 0,00002                                           | 0,00375                                          | 0,00010                                          | 22,9                                             | 0,5                                               | 1                              |
| 18290811e | 12c   | 130                 | 84555               | 13550              | 6,2  | 0,00116                                           | 0,00002                                           | 0,00371                                          | 0,00010                                          | 23,5                                             | 0,6                                               | 1                              |
| 20290811e | 14b   | 87                  | 70194               | 6649               | 10,6 | 0,00106                                           | 0,00002                                           | 0,00363                                          | 0,00010                                          | 21,5                                             | 0,5                                               | 1                              |
| 21290811e | 15b   | 119                 | 83301               | 12571              | 6,6  | 0,00111                                           | 0,00002                                           | 0,00338                                          | 0,00010                                          | 22,4                                             | 0,5                                               | 1                              |
| 25290811e | 17.1b | 111                 | 70629               | 12678              | 5,6  | 0,00113                                           | 0,00002                                           | 0,00377                                          | 0,00010                                          | 22,9                                             | 0,5                                               | 1                              |
| 26290811e | 17.2b | 101                 | 65407               | 11942              | 5,5  | 0,00111                                           | 0,00002                                           | 0,00365                                          | 0,00010                                          | 22,4                                             | 0,5                                               | 1                              |
| 27290811e | 18c   | 131                 | 92338               | 11749              | 7,9  | 0,00112                                           | 0,00002                                           | 0,00388                                          | 0,00010                                          | 22,6                                             | 0,5                                               | 1                              |
| 28290811e | 19b   | 79                  | 63457               | 5617               | 11,3 | 0,00109                                           | 0,00002                                           | 0,00350                                          | 0,00010                                          | 22,1                                             | 0,5                                               | 1                              |
| 29290811e | 20b   | 117                 | 81042               | 10766              | 7,5  | 0,00113                                           | 0,00002                                           | 0,00390                                          | 0,00010                                          | 22,9                                             | 0,5                                               | 1                              |
| 30290811e | 21c   | 100                 | 64494               | 11618              | 5,6  | 0,00113                                           | 0,00002                                           | 0,00366                                          | 0,00010                                          | 22,8                                             | 0,5                                               | 1                              |
| 31290811e | 22.1c | 106                 | 71677               | 11095              | 6,5  | 0,00112                                           | 0,00002                                           | 0,00372                                          | 0,00010                                          | 22,6                                             | 0,5                                               | 1                              |
| 32290811e | 22.2b | 100                 | 69481               | 10308              | 6,7  | 0,00110                                           | 0,00002                                           | 0,00363                                          | 0,00010                                          | 22,2                                             | 0,5                                               | 1                              |

a: not taken into account in the age calculation when italicized (see text for details)

**Table A11: T11N56 monazites**

| File#     | Spot# | Pb ppm <sup>1</sup> | Th ppm <sup>1</sup> | U ppm <sup>1</sup> | Th/U | <sup>208</sup> Pb/ <sup>232</sup> Th <sup>2</sup> | 2 σ error<br><sup>208</sup> Pb/ <sup>232</sup> Th | <sup>206</sup> Pb/ <sup>238</sup> U <sup>2</sup> | 2 σ error<br><sup>206</sup> Pb/ <sup>238</sup> U | Age (Ma)<br><sup>208</sup> Pb/ <sup>232</sup> Th | 2 σ error<br><sup>208</sup> Pb/ <sup>232</sup> Th | Age<br>population |
|-----------|-------|---------------------|---------------------|--------------------|------|---------------------------------------------------|---------------------------------------------------|--------------------------------------------------|--------------------------------------------------|--------------------------------------------------|---------------------------------------------------|-------------------|
| 05060711f | 01c   | 74                  | 41226               | 8265               | 5.0  | 0.00126                                           | 0.00003                                           | 0.00391                                          | 0.00012                                          | 25.4                                             | 0.8                                               | 4                 |
| 06060711f | 02c   | 89                  | 65500               | 16004              | 4.1  | 0.00089                                           | 0.00003                                           | 0.00277                                          | 0.00009                                          | 18.0                                             | 0.5                                               | 1                 |
| 07060711f | 03c   | 98                  | 72802               | 16296              | 4.5  | 0.00089                                           | 0.00003                                           | 0.00292                                          | 0.00009                                          | 17.9                                             | 0.5                                               | 1                 |
| 11060711f | 07b   | 140                 | 123103              | 18118              | 6.8  | 0.00088                                           | 0.00003                                           | 0.00279                                          | 0.00009                                          | 17.8                                             | 0.5                                               | 1                 |
| 12060711f | 08c   | 132                 | 103746              | 20718              | 5.0  | 0.00089                                           | 0.00003                                           | 0.00283                                          | 0.00009                                          | 18.0                                             | 0.5                                               | 1                 |
| 15060711f | 09c   | 42                  | 38054               | 4783               | 8.0  | 0.00089                                           | 0.00003                                           | 0.00288                                          | 0.00012                                          | 17.9                                             | 0.6                                               | 1                 |
| 16060711f | 10c-b | 81                  | 55326               | 6114               | 9.0  | 0.00120                                           | 0.00003                                           | 0.00385                                          | 0.00012                                          | 24.3                                             | 0.8                                               | 3                 |
| 17060711f | 11c   | 76                  | 56835               | 9460               | 6.0  | 0.00101                                           | 0.00003                                           | 0.00319                                          | 0.00012                                          | 20.3                                             | 0.7                                               | 2                 |
| 18060711f | 12c   | 62                  | 50095               | 8185               | 6.1  | 0.00092                                           | 0.00003                                           | 0.00290                                          | 0.00015                                          | 18.6                                             | 0.8                                               | 1                 |
| 19060711f | 13.1c | 61                  | 59777               | 6006               | 10.0 | 0.00086                                           | 0.00003                                           | 0.00280                                          | 0.00009                                          | 17.3                                             | 0.5                                               | 1                 |
| 20060711f | 13.2b | 87                  | 74789               | 12483              | 6.0  | 0.00085                                           | 0.00003                                           | 0.00283                                          | 0.00009                                          | 17.1                                             | 0.5                                               | 1                 |
| 21060711f | 14.1c | 65                  | 54476               | 8631               | 6.3  | 0.00088                                           | 0.00003                                           | 0.00282                                          | 0.00009                                          | 17.7                                             | 0.6                                               | 1                 |
| 22060711f | 14.2b | 125                 | 89012               | 25016              | 3.6  | 0.00086                                           | 0.00003                                           | 0.00272                                          | 0.00009                                          | 17.4                                             | 0.5                                               | 1                 |
| 25060711f | 15c   | 99                  | 61750               | 21833              | 2.8  | 0.00089                                           | 0.00003                                           | 0.00274                                          | 0.00009                                          | 18.0                                             | 0.6                                               | 1                 |
| 26060711f | 16c   | 119                 | 81442               | 25305              | 3.2  | 0.00086                                           | 0.00003                                           | 0.00269                                          | 0.00009                                          | 17.3                                             | 0.5                                               | 1                 |
| 27060711f | 17.1c | 50                  | 46775               | 6280               | 7.4  | 0.00085                                           | 0.00003                                           | 0.00272                                          | 0.00009                                          | 17.2                                             | 0.5                                               | 1                 |
| 28060711f | 17.2b | 64                  | 58798               | 7893               | 7.4  | 0.00086                                           | 0.00003                                           | 0.00276                                          | 0.00009                                          | 17.4                                             | 0.5                                               | 1                 |
| 29060711f | 18.1c | 88                  | 69244               | 14483              | 4.8  | 0.00087                                           | 0.00003                                           | 0.00278                                          | 0.00009                                          | 17.6                                             | 0.5                                               | 1                 |
| 30060711f | 18.2b | 88                  | 80058               | 10941              | 7.3  | 0.00085                                           | 0.00003                                           | 0.00280                                          | 0.00009                                          | 17.2                                             | 0.5                                               | 1                 |
| 31060711f | 19c   | 102                 | 88527               | 14842              | 6.0  | 0.00084                                           | 0.00003                                           | 0.00286                                          | 0.00009                                          | 17.0                                             | 0.5                                               | 1                 |
| 32060711f | 20cb  | 116                 | 93571               | 19513              | 4.8  | 0.00086                                           | 0.00003                                           | 0.00271                                          | 0.00009                                          | 17.3                                             | 0.5                                               | 1                 |

**Table A12: T11N37 zircons**

| File#     | Spot#  | Pb ppm <sup>1</sup> | Th ppm <sup>1</sup> | U ppm <sup>1</sup> | Th/U | <sup>207</sup> Pb/ <sup>235</sup> U <sup>2</sup> | 2 σ error<br><sup>207</sup> Pb/ <sup>235</sup> U | <sup>206</sup> Pb/ <sup>238</sup> U <sup>2</sup> | 2 σ error<br><sup>206</sup> Pb/ <sup>238</sup> U | Age (Ma)<br><sup>206</sup> Pb/ <sup>238</sup> U | 2 σ error<br><sup>206</sup> Pb/ <sup>238</sup> U | Age<br>population |
|-----------|--------|---------------------|---------------------|--------------------|------|--------------------------------------------------|--------------------------------------------------|--------------------------------------------------|--------------------------------------------------|-------------------------------------------------|--------------------------------------------------|-------------------|
| 05300811a | 01.1b  | 16                  | 36                  | 4155               | 0,01 | 0,02710                                          | 0,00078                                          | 0,00408                                          | 0,00010                                          | 26,2                                            | 0,6                                              | 1                 |
| 07300811a | 01.2c  | 40                  | 64                  | 9791               | 0,01 | 0,02862                                          | 0,00068                                          | 0,00441                                          | 0,00010                                          | 28,4                                            | 0,7                                              | 2                 |
| 10300811a | 04b    | 9,3                 | 25                  | 2669               | 0,01 | 0,02935                                          | 0,00084                                          | 0,00368                                          | 0,00008                                          | 23,7                                            | 0,5                                              | 3                 |
| 12300811a | 05.2b3 | 15                  | 47                  | 4728               | 0,01 | 0,02299                                          | 0,00074                                          | 0,00356                                          | 0,00008                                          | 22,9                                            | 0,5                                              | 3                 |
| 16300811a | 05.4c  | 19                  | 49                  | 5804               | 0,01 | 0,02294                                          | 0,00064                                          | 0,00354                                          | 0,00008                                          | 22,8                                            | 0,5                                              | 3                 |
| 17300811a | 06.1b2 | 16                  | 45                  | 4224               | 0,01 | 0,02622                                          | 0,00066                                          | 0,00404                                          | 0,00010                                          | 26,0                                            | 0,6                                              | 1                 |
| 18300811a | 06.2b1 | 20                  | 48                  | 5265               | 0,01 | 0,02597                                          | 0,00062                                          | 0,00405                                          | 0,00010                                          | 26,1                                            | 0,6                                              | 1                 |
| 19300811a | 06.3c  | 35                  | 65                  | 9600               | 0,01 | 0,02742                                          | 0,00066                                          | 0,00403                                          | 0,00010                                          | 25,9                                            | 0,6                                              | 1                 |
| 20300811a | 07b    | 20                  | 33                  | 5273               | 0,01 | 0,02684                                          | 0,00068                                          | 0,00408                                          | 0,00010                                          | 26,2                                            | 0,6                                              | 1                 |
| 21300811a | 08b    | 16                  | 37                  | 4188               | 0,01 | 0,02646                                          | 0,00080                                          | 0,00411                                          | 0,00010                                          | 26,4                                            | 0,6                                              | 1                 |
| 25300811a | 10b    | 33                  | 90                  | 8842               | 0,01 | 0,02674                                          | 0,00064                                          | 0,00408                                          | 0,00010                                          | 26,2                                            | 0,6                                              | 1                 |
| 27300811a | 12.1b  | 28                  | 101                 | 7435               | 0,01 | 0,02692                                          | 0,00066                                          | 0,00408                                          | 0,00010                                          | 26,2                                            | 0,6                                              | 1                 |
| 29300811a | 13.1b  | 14                  | 33                  | 4167               | 0,01 | 0,02387                                          | 0,00064                                          | 0,00357                                          | 0,00008                                          | 23,0                                            | 0,5                                              | 3                 |
| 30300811a | 13.2c  | 41                  | 102                 | 11050              | 0,01 | 0,02675                                          | 0,00066                                          | 0,00416                                          | 0,00010                                          | 26,7                                            | 0,6                                              | 1                 |
| 31300811a | 14b    | 13                  | 32                  | 3266               | 0,01 | 0,02683                                          | 0,00072                                          | 0,00416                                          | 0,00010                                          | 26,8                                            | 0,6                                              | 1                 |

**Table A13: T11N38 monazites**

| File#     | Spot# | Pb ppm <sup>1</sup> | Th ppm <sup>1</sup> | U ppm <sup>1</sup> | Th/U | <sup>208</sup> Pb/ <sup>232</sup> Th <sup>2</sup> | 2 $\sigma$ error<br><sup>208</sup> Pb/ <sup>232</sup> Th | <sup>206</sup> Pb/ <sup>238</sup> U <sup>2</sup> | 2 $\sigma$ error<br><sup>206</sup> Pb/ <sup>238</sup> U | Age (Ma)<br><sup>208</sup> Pb/ <sup>232</sup> Th | 2 $\sigma$ error<br><sup>208</sup> Pb/ <sup>232</sup> Th | Age<br>population |
|-----------|-------|---------------------|---------------------|--------------------|------|---------------------------------------------------|----------------------------------------------------------|--------------------------------------------------|---------------------------------------------------------|--------------------------------------------------|----------------------------------------------------------|-------------------|
| 06070711e | 02c   | 54                  | 54012               | 4822               | 11.2 | 0.00087                                           | 0.00003                                                  | 0.00277                                          | 0.00009                                                 | 17.5                                             | 0.6                                                      | 1                 |
| 07070711e | 03c   | 52                  | 57026               | 3391               | 16.8 | 0.00084                                           | 0.00003                                                  | 0.00283                                          | 0.00009                                                 | 16.9                                             | 0.5                                                      | 1                 |
| 08070711e | 04c   | 50                  | 50897               | 4642               | 11.0 | 0.00085                                           | 0.00003                                                  | 0.00274                                          | 0.00009                                                 | 17.3                                             | 0.5                                                      | 1                 |
| 09070711e | 05c   | 55                  | 49790               | 7465               | 6.7  | 0.00086                                           | 0.00003                                                  | 0.00263                                          | 0.00009                                                 | 17.4                                             | 0.5                                                      | 1                 |
| 10070711e | 06c   | 52                  | 52496               | 4864               | 10.8 | 0.00085                                           | 0.00003                                                  | 0.00276                                          | 0.00009                                                 | 17.3                                             | 0.5                                                      | 1                 |
| 12070711e | 08b   | 54                  | 55986               | 4730               | 11.8 | 0.00084                                           | 0.00003                                                  | 0.00275                                          | 0.00009                                                 | 17.0                                             | 0.5                                                      | 1                 |
| 15070711e | 09cb  | 56                  | 52885               | 6802               | 7.8  | 0.00085                                           | 0.00003                                                  | 0.00268                                          | 0.00009                                                 | 17.2                                             | 0.5                                                      | 1                 |
| 16070711e | 10c   | 63                  | 52728               | 10039              | 5.3  | 0.00087                                           | 0.00003                                                  | 0.00259                                          | 0.00009                                                 | 17.5                                             | 0.6                                                      | 1                 |
| 17070711e | 11c   | 46                  | 45014               | 5153               | 8.7  | 0.00085                                           | 0.00003                                                  | 0.00274                                          | 0.00009                                                 | 17.1                                             | 0.6                                                      | 1                 |
| 18070711e | 12.2b | 139                 | 76533               | 11721              | 6.5  | 0.00140                                           | 0.00003                                                  | 0.00440                                          | 0.00015                                                 | 28.2                                             | 0.9                                                      | 2                 |
| 20070711e | 14b   | 54                  | 54843               | 5031               | 10.9 | 0.00084                                           | 0.00003                                                  | 0.00279                                          | 0.00009                                                 | 16.9                                             | 0.5                                                      | 1                 |
| 21070711e | 15c   | 56                  | 58713               | 5084               | 11.5 | 0.00083                                           | 0.00003                                                  | 0.00259                                          | 0.00009                                                 | 16.7                                             | 0.5                                                      | 1                 |
| 22070711e | 16c   | 51                  | 52683               | 4399               | 12.0 | 0.00086                                           | 0.00003                                                  | 0.00275                                          | 0.00009                                                 | 17.3                                             | 0.5                                                      | 1                 |
| 25070711e | 17b   | 53                  | 51472               | 5198               | 9.9  | 0.00087                                           | 0.00003                                                  | 0.00277                                          | 0.00009                                                 | 17.5                                             | 0.6                                                      | 1                 |
| 26070711e | 18c   | 51                  | 51293               | 4909               | 10.4 | 0.00085                                           | 0.00003                                                  | 0.00272                                          | 0.00009                                                 | 17.2                                             | 0.5                                                      | 1                 |
| 27070711e | 19.2b | 161                 | 56765               | 22428              | 2.5  | 0.00152                                           | 0.00006                                                  | 0.00457                                          | 0.00015                                                 | 30.6                                             | 1.0                                                      | 2                 |
| 29070711e | 20c   | 47                  | 51851               | 3015               | 17.2 | 0.00083                                           | 0.00003                                                  | 0.00284                                          | 0.00012                                                 | 16.7                                             | 0.5                                                      | 1                 |
| 28070711e | 21c   | 58                  | 56960               | 5581               | 10.2 | 0.00087                                           | 0.00003                                                  | 0.00271                                          | 0.00009                                                 | 17.5                                             | 0.6                                                      | 1                 |
| 30070711e | 22c   | 63                  | 54579               | 9391               | 5.8  | 0.00084                                           | 0.00003                                                  | 0.00268                                          | 0.00009                                                 | 17.0                                             | 0.5                                                      | 1                 |
| 37290811e | 12.3b | 135                 | 71786               | 11242              | 6.4  | 0.00144                                           | 0.00004                                                  | 0.00446                                          | 0.00012                                                 | 29.1                                             | 0.7                                                      | 2                 |
| 38290811e | 12.1b | 118                 | 61811               | 10222              | 6.0  | 0.00145                                           | 0.00004                                                  | 0.00443                                          | 0.00012                                                 | 29.2                                             | 0.7                                                      | 2                 |
| 39290811e | 19.3b | 142                 | 60202               | 16402              | 3.7  | 0.00148                                           | 0.00004                                                  | 0.00458                                          | 0.00012                                                 | 30.0                                             | 0.7                                                      | 2                 |
| 40290811e | 19.1b | 146                 | 54825               | 20593              | 2.7  | 0.00147                                           | 0.00004                                                  | 0.00452                                          | 0.00012                                                 | 29.6                                             | 0.7                                                      | 2                 |

**Table A14: T11N39 monazites**

| File#     | Spot# | Pb ppm <sup>1</sup> | Th ppm <sup>1</sup> | U ppm <sup>1</sup> | Th/U | <sup>208</sup> Pb/ <sup>232</sup> Th <sup>2</sup> | 2 σ error<br><sup>208</sup> Pb/ <sup>232</sup> Th | <sup>206</sup> Pb/ <sup>238</sup> U <sup>2</sup> | 2 σ error<br><sup>206</sup> Pb/ <sup>238</sup> U | Age (Ma)<br><sup>208</sup> Pb/ <sup>232</sup> Th | 2 σ error<br><sup>208</sup> Pb/ <sup>232</sup> Th | Age<br>population |
|-----------|-------|---------------------|---------------------|--------------------|------|---------------------------------------------------|---------------------------------------------------|--------------------------------------------------|--------------------------------------------------|--------------------------------------------------|---------------------------------------------------|-------------------|
| 05070711f | 1b    | 47                  | 53138               | 4926               | 10.8 | 0.00076                                           | 0.00003                                           | 0.00238                                          | 0.00009                                          | 15.3                                             | 0.5                                               | 1                 |
| 06070711f | 2b    | 39                  | 45107               | 3877               | 11.6 | 0.00075                                           | 0.00003                                           | 0.0024                                           | 0.00012                                          | 15.3                                             | 0.5                                               | 1                 |
| 07070711f | 3c    | 51                  | 60801               | 4535               | 13.4 | 0.00074                                           | 0.00003                                           | 0.00247                                          | 0.00009                                          | 15.0                                             | 0.5                                               | 1                 |
| 08070711f | 4cd   | 49                  | 58174               | 4559               | 12.8 | 0.00076                                           | 0.00003                                           | 0.00245                                          | 0.00009                                          | 15.3                                             | 0.5                                               | 1                 |
| 09070711f | 5c    | 34                  | 44634               | 1475               | 30.3 | 0.00075                                           | 0.00003                                           | 0.00256                                          | 0.00012                                          | 15.1                                             | 0.5                                               | 1                 |
| 10070711f | 6cb   | 44                  | 54776               | 2100               | 26.1 | 0.00078                                           | 0.00003                                           | 0.00277                                          | 0.00012                                          | 15.7                                             | 0.5                                               | 1                 |
| 11070711f | 7c    | 44                  | 57868               | 1800               | 32.2 | 0.00076                                           | 0.00003                                           | 0.00257                                          | 0.00012                                          | 15.4                                             | 0.5                                               | 1                 |
| 12070711f | 8c    | 36                  | 39575               | 3967               | 10.0 | 0.00077                                           | 0.00003                                           | 0.00239                                          | 0.00009                                          | 15.5                                             | 0.5                                               | 1                 |
| 15070711f | 9c    | 43                  | 55498               | 2137               | 26.0 | 0.00075                                           | 0.00003                                           | 0.00261                                          | 0.00009                                          | 15.1                                             | 0.5                                               | 1                 |
| 16070711f | 10c   | 49                  | 60716               | 3485               | 17.4 | 0.00076                                           | 0.00003                                           | 0.00245                                          | 0.00009                                          | 15.3                                             | 0.5                                               | 1                 |
| 17070711f | 11c   | 34                  | 40273               | 3031               | 13.3 | 0.00075                                           | 0.00003                                           | 0.00246                                          | 0.00012                                          | 15.1                                             | 0.5                                               | 1                 |
| 18070711f | 12c   | 38                  | 42738               | 3802               | 11.2 | 0.00077                                           | 0.00003                                           | 0.00245                                          | 0.00009                                          | 15.7                                             | 0.5                                               | 1                 |
| 20070711f | 13.2b | 31                  | 33539               | 3671               | 9.1  | 0.00077                                           | 0.00003                                           | 0.00241                                          | 0.00009                                          | 15.6                                             | 0.5                                               | 1                 |
| 21070711f | 14c   | 39                  | 50078               | 1707               | 29.3 | 0.00076                                           | 0.00003                                           | 0.00278                                          | 0.00012                                          | 15.4                                             | 0.5                                               | 1                 |
| 25070711f | 16b   | 35                  | 42937               | 2438               | 17.6 | 0.00075                                           | 0.00003                                           | 0.00257                                          | 0.00009                                          | 15.2                                             | 0.5                                               | 1                 |
| 26070711f | 17b   | 46                  | 55164               | 3879               | 14.2 | 0.00076                                           | 0.00003                                           | 0.00243                                          | 0.00009                                          | 15.4                                             | 0.5                                               | 1                 |
| 27070711f | 18b   | 58                  | 51110               | 11377              | 4.5  | 0.00077                                           | 0.00003                                           | 0.00237                                          | 0.00009                                          | 15.6                                             | 0.5                                               | 1                 |
| 28070711f | 19cb  | 46                  | 56134               | 2785               | 20.2 | 0.00078                                           | 0.00003                                           | 0.00253                                          | 0.00009                                          | 15.7                                             | 0.5                                               | 1                 |
| 29070711f | 20c   | 40                  | 43601               | 4396               | 9.9  | 0.00078                                           | 0.00003                                           | 0.00239                                          | 0.00009                                          | 15.8                                             | 0.5                                               | 1                 |
| 30070711f | 21cb  | 39                  | 45925               | 2529               | 18.2 | 0.00078                                           | 0.00003                                           | 0.0028                                           | 0.00012                                          | 15.8                                             | 0.5                                               | 1                 |
| 31070711f | 22b   | 54                  | 57393               | 6764               | 8.5  | 0.00076                                           | 0.00003                                           | 0.00241                                          | 0.00009                                          | 15.4                                             | 0.5                                               | 1                 |
| 32070711f | 23b   | 50                  | 55762               | 5315               | 10.5 | 0.00078                                           | 0.00003                                           | 0.00236                                          | 0.00009                                          | 15.8                                             | 0.5                                               | 1                 |

**Table A15: T11N33 monazites**

| File#     | Spot# | Pb ppm <sup>1</sup> | Th ppm <sup>1</sup> | U ppm <sup>1</sup> | Th/U | <sup>208</sup> Pb/ <sup>232</sup> Th <sup>2</sup> | 2 σ error<br><sup>208</sup> Pb/ <sup>232</sup> Th | <sup>206</sup> Pb/ <sup>238</sup> U <sup>2</sup> | 2 σ error<br><sup>206</sup> Pb/ <sup>238</sup> U | Age (Ma)<br><sup>208</sup> Pb/ <sup>232</sup> Th | 2 σ error<br><sup>208</sup> Pb/ <sup>232</sup> Th | Age<br>population |
|-----------|-------|---------------------|---------------------|--------------------|------|---------------------------------------------------|---------------------------------------------------|--------------------------------------------------|--------------------------------------------------|--------------------------------------------------|---------------------------------------------------|-------------------|
| 05070711a | 1cb   | 59                  | 52959               | 10467              | 5.1  | 0.00079                                           | 0.00003                                           | 0.00250                                          | 0.00009                                          | 15.9                                             | 0.5                                               | 1                 |
| 06070711a | 2c    | 54                  | 67564               | 2713               | 24.9 | 0.00078                                           | 0.00003                                           | 0.00267                                          | 0.00012                                          | 15.7                                             | 0.5                                               | 1                 |
| 07070711a | 3c    | 83                  | 62663               | 19561              | 3.2  | 0.00078                                           | 0.00003                                           | 0.00242                                          | 0.00009                                          | 15.8                                             | 0.5                                               | 1                 |
| 08070711a | 4c    | 61                  | 74608               | 3532               | 21.1 | 0.00078                                           | 0.00003                                           | 0.00267                                          | 0.00009                                          | 15.7                                             | 0.5                                               | 1                 |
| 09070711a | 5cb   | 47                  | 59361               | 2440               | 24.3 | 0.00077                                           | 0.00003                                           | 0.00277                                          | 0.00012                                          | 15.6                                             | 0.5                                               | 1                 |
| 10070711a | 6c    | 45                  | 57096               | 2282               | 25.0 | 0.00076                                           | 0.00003                                           | 0.00272                                          | 0.00012                                          | 15.4                                             | 0.5                                               | 1                 |
| 11070711a | 7cb   | 46                  | 57284               | 2574               | 22.3 | 0.00078                                           | 0.00003                                           | 0.00262                                          | 0.00012                                          | 15.7                                             | 0.5                                               | 1                 |
| 12070711a | 8b    | 50                  | 62245               | 2449               | 25.4 | 0.00078                                           | 0.00003                                           | 0.00268                                          | 0.00012                                          | 15.7                                             | 0.5                                               | 1                 |
| 15070711a | 9c    | 53                  | 54935               | 6701               | 8.2  | 0.00078                                           | 0.00003                                           | 0.00251                                          | 0.00009                                          | 15.8                                             | 0.5                                               | 1                 |
| 16070711a | 10cb  | 60                  | 60853               | 7263               | 8.4  | 0.00078                                           | 0.00003                                           | 0.00267                                          | 0.00009                                          | 15.7                                             | 0.5                                               | 1                 |
| 17070711a | 11cb  | 44                  | 51454               | 3139               | 16.4 | 0.00077                                           | 0.00003                                           | 0.00260                                          | 0.00009                                          | 15.7                                             | 0.5                                               | 1                 |
| 18070711a | 12c   | 44                  | 55002               | 2117               | 26.0 | 0.00077                                           | 0.00003                                           | 0.00280                                          | 0.00012                                          | 15.6                                             | 0.5                                               | 1                 |
| 19070711a | 13cb  | 45                  | 54390               | 3252               | 16.7 | 0.00077                                           | 0.00003                                           | 0.00264                                          | 0.00009                                          | 15.6                                             | 0.5                                               | 1                 |
| 20070711a | 14cb  | 46                  | 57232               | 2388               | 24.0 | 0.00077                                           | 0.00003                                           | 0.00279                                          | 0.00012                                          | 15.6                                             | 0.5                                               | 1                 |
| 21070711a | 15cb  | 45                  | 54311               | 3709               | 14.6 | 0.00076                                           | 0.00003                                           | 0.00252                                          | 0.00009                                          | 15.5                                             | 0.5                                               | 1                 |
| 22070711a | 16cb  | 48                  | 60087               | 2089               | 28.8 | 0.00078                                           | 0.00003                                           | 0.00282                                          | 0.00012                                          | 15.7                                             | 0.5                                               | 1                 |
| 25070711a | 17c   | 45                  | 57244               | 2134               | 26.8 | 0.00077                                           | 0.00003                                           | 0.00266                                          | 0.00012                                          | 15.5                                             | 0.5                                               | 1                 |
| 26070711a | 18c   | 40                  | 50249               | 1719               | 29.2 | 0.00078                                           | 0.00003                                           | 0.00278                                          | 0.00012                                          | 15.8                                             | 0.5                                               | 1                 |
| 27070711a | 19cb  | 49                  | 60686               | 2416               | 25.1 | 0.00077                                           | 0.00003                                           | 0.00267                                          | 0.00012                                          | 15.5                                             | 0.5                                               | 1                 |
| 28070711a | 20cb  | 39                  | 46582               | 2553               | 18.2 | 0.00076                                           | 0.00003                                           | 0.00260                                          | 0.00009                                          | 15.5                                             | 0.5                                               | 1                 |
| 29070711a | 21cb  | 49                  | 62470               | 2736               | 22.8 | 0.00077                                           | 0.00003                                           | 0.00263                                          | 0.00009                                          | 15.5                                             | 0.5                                               | 1                 |
| 30070711a | 22c   | 47                  | 59319               | 2283               | 26.0 | 0.00077                                           | 0.00003                                           | 0.00265                                          | 0.00012                                          | 15.6                                             | 0.5                                               | 1                 |
| 31070711a | 23cb  | 50                  | 64831               | 2346               | 27.6 | 0.00076                                           | 0.00003                                           | 0.00267                                          | 0.00012                                          | 15.3                                             | 0.5                                               | 1                 |
| 32070711a | 24c   | 43                  | 54161               | 2619               | 20.7 | 0.00076                                           | 0.00003                                           | 0.00254                                          | 0.00009                                          | 15.4                                             | 0.5                                               | 1                 |

**Table A16: T11N34 monazites**

| File#     | Spot# | Pb ppm <sup>1</sup> | Th ppm <sup>1</sup> | U ppm <sup>1</sup> | Th/U | <sup>208</sup> Pb/ <sup>232</sup> Th <sup>2</sup> | 2 σ error<br><sup>208</sup> Pb/ <sup>232</sup> Th | <sup>206</sup> Pb/ <sup>238</sup> U <sup>2</sup> | 2 σ error<br><sup>206</sup> Pb/ <sup>238</sup> U | Age (Ma)<br><sup>208</sup> Pb/ <sup>232</sup> Th | 2 σ error<br><sup>208</sup> Pb/ <sup>232</sup> Th | Age<br>population |
|-----------|-------|---------------------|---------------------|--------------------|------|---------------------------------------------------|---------------------------------------------------|--------------------------------------------------|--------------------------------------------------|--------------------------------------------------|---------------------------------------------------|-------------------|
| 05070711b | 1c    | 74                  | 64472               | 15227              | 4.2  | 0.00076                                           | 0.00003                                           | 0.00237                                          | 0.00009                                          | 15.3                                             | 0.5                                               | 1                 |
| 06070711b | 2b    | 46                  | 57844               | 3039               | 19.0 | 0.00075                                           | 0.00003                                           | 0.00260                                          | 0.00009                                          | 15.2                                             | 0.5                                               | 1                 |
| 07070711b | 3c    | 38                  | 45761               | 3168               | 14.4 | 0.00075                                           | 0.00003                                           | 0.00268                                          | 0.00012                                          | 15.2                                             | 0.5                                               | 1                 |
| 08070711b | 4c    | 41                  | 50534               | 2541               | 19.9 | 0.00076                                           | 0.00003                                           | 0.00266                                          | 0.00012                                          | 15.3                                             | 0.5                                               | 1                 |
| 09070711b | 5c    | 42                  | 53715               | 1840               | 29.2 | 0.00076                                           | 0.00003                                           | 0.00289                                          | 0.00015                                          | 15.3                                             | 0.5                                               | 1                 |
| 10070711b | 6c    | 48                  | 52793               | 5289               | 10.0 | 0.00077                                           | 0.00003                                           | 0.00255                                          | 0.00009                                          | 15.5                                             | 0.5                                               | 1                 |
| 11070711b | 7c    | 53                  | 58157               | 5805               | 10.0 | 0.00075                                           | 0.00003                                           | 0.00254                                          | 0.00012                                          | 15.2                                             | 0.6                                               | 1                 |
| 12070711b | 8c    | 51                  | 57338               | 5219               | 11.0 | 0.00077                                           | 0.00003                                           | 0.00249                                          | 0.00009                                          | 15.5                                             | 0.5                                               | 1                 |
| 15070711b | 9c    | 37                  | 38004               | 5392               | 7.0  | 0.00076                                           | 0.00003                                           | 0.00239                                          | 0.00009                                          | 15.3                                             | 0.5                                               | 1                 |
| 16070711b | 10c   | 47                  | 58607               | 2928               | 20.0 | 0.00076                                           | 0.00003                                           | 0.00253                                          | 0.00012                                          | 15.4                                             | 0.5                                               | 1                 |
| 17070711b | 11c   | 53                  | 61426               | 4569               | 13.4 | 0.00077                                           | 0.00003                                           | 0.00260                                          | 0.00012                                          | 15.5                                             | 0.5                                               | 1                 |
| 18070711b | 12c   | 41                  | 54215               | 1298               | 41.8 | 0.00076                                           | 0.00003                                           | 0.00276                                          | 0.00015                                          | 15.4                                             | 0.5                                               | 1                 |
| 19070711b | 13b   | 44                  | 53430               | 3189               | 16.8 | 0.00076                                           | 0.00003                                           | 0.00259                                          | 0.00012                                          | 15.3                                             | 0.5                                               | 1                 |
| 21070711b | 15c   | 43                  | 54903               | 1506               | 36.5 | 0.00076                                           | 0.00003                                           | 0.00281                                          | 0.00015                                          | 15.4                                             | 0.5                                               | 1                 |
| 22070711b | 16c   | 39                  | 47472               | 2180               | 21.8 | 0.00077                                           | 0.00003                                           | 0.00267                                          | 0.00018                                          | 15.5                                             | 0.6                                               | 1                 |
| 25070711b | 17b   | 45                  | 43102               | 7260               | 5.9  | 0.00078                                           | 0.00003                                           | 0.00250                                          | 0.00009                                          | 15.7                                             | 0.5                                               | 1                 |
| 26070711b | 18b   | 50                  | 61343               | 3345               | 18.3 | 0.00075                                           | 0.00003                                           | 0.00257                                          | 0.00012                                          | 15.2                                             | 0.5                                               | 1                 |
| 27070711b | 19b   | 80                  | 58378               | 21302              | 2.7  | 0.00075                                           | 0.00003                                           | 0.00235                                          | 0.00009                                          | 15.1                                             | 0.5                                               | 1                 |
| 28070711b | 20c   | 39                  | 49602               | 2100               | 23.6 | 0.00074                                           | 0.00003                                           | 0.00266                                          | 0.00012                                          | 15.1                                             | 0.5                                               | 1                 |
| 29070711b | 21c   | 37                  | 47465               | 1813               | 26.2 | 0.00074                                           | 0.00003                                           | 0.00264                                          | 0.00015                                          | 15.0                                             | 0.5                                               | 1                 |
| 30070711b | 22c   | 42                  | 53779               | 1865               | 28.8 | 0.00076                                           | 0.00003                                           | 0.00261                                          | 0.00012                                          | 15.3                                             | 0.5                                               | 1                 |
| 31070711b | 23c   | 79                  | 52025               | 21688              | 2.4  | 0.00076                                           | 0.00003                                           | 0.00243                                          | 0.00009                                          | 15.4                                             | 0.5                                               | 1                 |
| 32070711b | 24c   | 50                  | 63398               | 3131               | 20.2 | 0.00075                                           | 0.00003                                           | 0.00255                                          | 0.00009                                          | 15.2                                             | 0.5                                               | 1                 |



**Table A17: T11N29 monazites**

| File#     | Spot# | Pb ppm <sup>1</sup> | Th ppm <sup>1</sup> | U ppm <sup>1</sup> | Th/U | <sup>208</sup> Pb/ <sup>232</sup> Th <sup>2</sup> | 2 σ error<br><sup>208</sup> Pb/ <sup>232</sup> Th | <sup>206</sup> Pb/ <sup>238</sup> U <sup>2</sup> | 2 σ error<br><sup>206</sup> Pb/ <sup>238</sup> U | Age (Ma)<br><sup>208</sup> Pb/ <sup>232</sup> Th | 2 σ error<br><sup>208</sup> Pb/ <sup>232</sup> Th | Age<br>population |
|-----------|-------|---------------------|---------------------|--------------------|------|---------------------------------------------------|---------------------------------------------------|--------------------------------------------------|--------------------------------------------------|--------------------------------------------------|---------------------------------------------------|-------------------|
| 05060711c | 01c   | 147                 | 89965               | 19582              | 4.6  | 0.00108                                           | 0.00003                                           | 0.00358                                          | 0.00012                                          | 21.8                                             | 0.4                                               | 1                 |
| 06060711c | 02.1c | 73                  | 51461               | 8506               | 6.1  | 0.00104                                           | 0.00003                                           | 0.00337                                          | 0.00012                                          | 21.1                                             | 0.4                                               | 1                 |
| 07060711c | 02.2b | 101                 | 71978               | 11490              | 6.3  | 0.00104                                           | 0.00003                                           | 0.00348                                          | 0.00012                                          | 21.0                                             | 0.4                                               | 1                 |
| 08060711c | 03b   | 116                 | 69479               | 4827               | 14.4 | 0.00153                                           | 0.00006                                           | 0.00485                                          | 0.00018                                          | 30.8                                             | 0.6                                               | 2                 |
| 10060711c | 05c   | 83                  | 55855               | 10339              | 5.4  | 0.00107                                           | 0.00003                                           | 0.00346                                          | 0.00012                                          | 21.5                                             | 0.4                                               | 1                 |
| 11060711c | 06b   | 86                  | 67130               | 9328               | 7.2  | 0.00098                                           | 0.00003                                           | 0.00346                                          | 0.00012                                          | 19.8                                             | 0.4                                               |                   |
| 12060711c | 07b   | 68                  | 47565               | 8325               | 5.7  | 0.00104                                           | 0.00003                                           | 0.00340                                          | 0.00012                                          | 21.1                                             | 0.4                                               | 1                 |
| 16060711c | 09.1c | 82                  | 57647               | 10090              | 5.7  | 0.00103                                           | 0.00003                                           | 0.00336                                          | 0.00012                                          | 20.9                                             | 0.4                                               | 1                 |
| 17060711c | 09.2b | 135                 | 88232               | 18363              | 4.8  | 0.00104                                           | 0.00003                                           | 0.00340                                          | 0.00012                                          | 21.0                                             | 0.4                                               | 1                 |
| 18060711c | 10c   | 62                  | 39947               | 9056               | 4.4  | 0.00105                                           | 0.00003                                           | 0.00321                                          | 0.00012                                          | 21.2                                             | 0.4                                               | 1                 |
| 19060711c | 11c   | 66                  | 46872               | 7139               | 6.6  | 0.00108                                           | 0.00003                                           | 0.00340                                          | 0.00012                                          | 21.7                                             | 0.4                                               | 1                 |
| 20060711c | 12.1b | 135                 | 87937               | 19119              | 4.6  | 0.00102                                           | 0.00003                                           | 0.00339                                          | 0.00012                                          | 20.7                                             | 0.4                                               | 1                 |
| 21060711c | 12.2b | 88                  | 62186               | 10385              | 6.0  | 0.00103                                           | 0.00003                                           | 0.00346                                          | 0.00012                                          | 20.8                                             | 0.4                                               | 1                 |
| 22060711c | 13c   | 92                  | 71666               | 7354               | 9.7  | 0.00106                                           | 0.00003                                           | 0.00373                                          | 0.00012                                          | 21.3                                             | 0.4                                               | 1                 |
| 26060711c | 14b   | 69                  | 44580               | 9920               | 4.5  | 0.00105                                           | 0.00003                                           | 0.00326                                          | 0.00012                                          | 21.2                                             | 0.4                                               | 1                 |
| 27060711c | 15c   | 90                  | 54209               | 15451              | 3.5  | 0.00101                                           | 0.00003                                           | 0.00324                                          | 0.00012                                          | 20.4                                             | 0.4                                               | 1                 |
| 28060711c | 17c   | 83                  | 66043               | 11794              | 5.6  | 0.00103                                           | 0.00003                                           | 0.00375                                          | 0.00012                                          | 20.9                                             | 0.4                                               | 1                 |

**Table A18: T11N30 zircons**

| File#     | Spot#  | Pb ppm <sup>l</sup> | Th ppm <sup>l</sup> | U ppm <sup>l</sup> | Th/U | <sup>207</sup> Pb/ <sup>235</sup> U <sup>2</sup> | 2 σ error<br><sup>207</sup> Pb/ <sup>235</sup> U | <sup>206</sup> Pb/ <sup>238</sup> U <sup>2</sup> | 2 σ error<br><sup>206</sup> Pb/ <sup>238</sup> U | Age (Ma)<br><sup>206</sup> Pb/ <sup>238</sup> U | 2 σ error<br><sup>206</sup> Pb/ <sup>238</sup> U | Age<br>population <sup>a</sup> |
|-----------|--------|---------------------|---------------------|--------------------|------|--------------------------------------------------|--------------------------------------------------|--------------------------------------------------|--------------------------------------------------|-------------------------------------------------|--------------------------------------------------|--------------------------------|
| 05300811b | 01.1b  | 32                  | 195                 | 12396              | 0,02 | 0,01914                                          | 0,00052                                          | 0,00284                                          | 0,00006                                          | 18,3                                            | 0,4                                              | 1                              |
| 06300811b | 01.2c  | 21                  | 84                  | 699                | 0,12 | 0,23298                                          | 0,00658                                          | 0,02997                                          | 0,00064                                          | 190                                             | 4                                                | 3                              |
| 07300811b | 02b    | 5,7                 | 11                  | 2165               | 0,01 | 0,01887                                          | 0,00082                                          | 0,00290                                          | 0,00006                                          | 18,7                                            | 0,4                                              | 1                              |
| 09300811b | 04.1b  | 91                  | 86                  | 1311               | 0,07 | 0,58909                                          | 0,01296                                          | 0,07542                                          | 0,00156                                          | 469                                             | 9                                                | 2                              |
| 10300811b | 05b    | 8,2                 | 19                  | 3058               | 0,01 | 0,01938                                          | 0,00056                                          | 0,00295                                          | 0,00006                                          | 19,0                                            | 0,4                                              | 1                              |
| 11300811b | 04.2b  | 40                  | 65                  | 625                | 0,10 | 0,53604                                          | 0,01314                                          | 0,06826                                          | 0,00142                                          | 426                                             | 9                                                | 2                              |
| 18300811b | 10b1   | 29                  | 47                  | 1129               | 0,04 | 0,21299                                          | 0,00634                                          | 0,02715                                          | 0,00058                                          | 173                                             | 4                                                | 3                              |
| 19300811b | 11b    | 7,2                 | 18                  | 2714               | 0,01 | 0,01895                                          | 0,00086                                          | 0,00292                                          | 0,00006                                          | 18,8                                            | 0,4                                              | 1                              |
| 21300811b | 13b    | 14                  | 33                  | 5451               | 0,01 | 0,01954                                          | 0,00058                                          | 0,00282                                          | 0,00006                                          | 18,1                                            | 0,4                                              | 1                              |
| 22300811b | 14b    | 12                  | 21                  | 4192               | 0,01 | 0,01973                                          | 0,00062                                          | 0,00295                                          | 0,00006                                          | 19,0                                            | 0,4                                              | 1                              |
| 25300811b | 15b    | 14                  | 38                  | 5380               | 0,01 | 0,01916                                          | 0,00056                                          | 0,00284                                          | 0,00006                                          | 18,3                                            | 0,4                                              | 1                              |
| 27300811b | 16.2b2 | 34                  | 26                  | 2323               | 0,01 | 0,12235                                          | 0,00306                                          | 0,01568                                          | 0,00032                                          | 100                                             | 2                                                | 3                              |
| 28300811b | 16.3b3 | 27                  | 108                 | 355                | 0,30 | 0,60239                                          | 0,01424                                          | 0,07625                                          | 0,00156                                          | 474                                             | 9                                                | 2                              |
| 29300811b | 16.4c  | 81                  | 762                 | 1017               | 0,75 | 0,54790                                          | 0,01284                                          | 0,06905                                          | 0,00140                                          | 430                                             | 8                                                | 2                              |
| 31300811b | 18.1b  | 16                  | 32                  | 5960               | 0,01 | 0,02019                                          | 0,00062                                          | 0,00294                                          | 0,00006                                          | 18,9                                            | 0,4                                              | 1                              |

a: not taken into account in the age calculation when italicized (see text for details)

| Table A19 (S1 in Liu et al., 2012): T11N25 zircons |       |                     |                     |                    |      |                                                   |                                                   |                                                  |                                                  |                                                  |                                                   |                   |
|----------------------------------------------------|-------|---------------------|---------------------|--------------------|------|---------------------------------------------------|---------------------------------------------------|--------------------------------------------------|--------------------------------------------------|--------------------------------------------------|---------------------------------------------------|-------------------|
| File#                                              | Spot# | Pb ppm <sup>1</sup> | Th ppm <sup>1</sup> | U ppm <sup>1</sup> | Th/U | <sup>208</sup> Pb/ <sup>232</sup> Th <sup>2</sup> | 2 σ error<br><sup>208</sup> Pb/ <sup>232</sup> Th | <sup>206</sup> Pb/ <sup>238</sup> U <sup>2</sup> | 2 σ error<br><sup>206</sup> Pb/ <sup>238</sup> U | Age (Ma)<br><sup>208</sup> Pb/ <sup>232</sup> Th | 2 σ error<br><sup>208</sup> Pb/ <sup>232</sup> Th | Age<br>population |
| 05300811c                                          | 01b   | 71                  | 80                  | 143                | 0,56 | 9,31116                                           | 0,19682                                           | 0,41851                                          | 0,00846                                          | 2254                                             | 38                                                | 4                 |
| 19300811c                                          | 14b   | 11                  | 143                 | 4527               | 0,03 | 0,01925                                           | 0,00052                                           | 0,00265                                          | 0,00006                                          | 17,1                                             | 0,3                                               | 1                 |
| 20300811c                                          | 18b   | 24                  | 331                 | 9959               | 0,03 | 0,01728                                           | 0,00050                                           | 0,00264                                          | 0,00006                                          | 17,0                                             | 0,3                                               | 1                 |
| 25300811c                                          | 21b   | 15                  | 234                 | 6014               | 0,04 | 0,01804                                           | 0,00064                                           | 0,00267                                          | 0,00006                                          | 17,2                                             | 0,4                                               | 1                 |
| 26300811c                                          | 22b   | 24                  | 299                 | 10006              | 0,03 | 0,01799                                           | 0,00050                                           | 0,00262                                          | 0,00006                                          | 16,9                                             | 0,3                                               | 1                 |
| 27300811c                                          | 26b   | 73                  | 1105                | 27200              | 0,04 | 0,02680                                           | 0,00062                                           | 0,00269                                          | 0,00006                                          | 17,3                                             | 0,3                                               | 1                 |
| 29300811c                                          | 07c   | 42                  | 198                 | 709                | 0,28 | 0,44774                                           | 0,01160                                           | 0,05832                                          | 0,00118                                          | 365                                              | 7                                                 | 2                 |
| 30300811c                                          | 12c   | 4,8                 | 107                 | 1924               | 0,06 | 0,01729                                           | 0,00074                                           | 0,00267                                          | 0,00006                                          | 17,2                                             | 0,4                                               | 1                 |
| 31300811c                                          | 13c   | 17                  | 288                 | 6987               | 0,04 | 0,01749                                           | 0,00044                                           | 0,00272                                          | 0,00006                                          | 17,5                                             | 0,3                                               | 1                 |
| 32300811c                                          | 11c   | 155                 | 2141                | 777                | 2,76 | 1,02553                                           | 0,02296                                           | 0,11105                                          | 0,00220                                          | 679                                              | 13                                                | 3                 |

| Table A20 (S2 in Liu et al., 2012): T11N32 monazites |        |                     |                     |                    |      |                                                   |                                                   |                                                  |                                                  |                                                  |                                                   |                   |
|------------------------------------------------------|--------|---------------------|---------------------|--------------------|------|---------------------------------------------------|---------------------------------------------------|--------------------------------------------------|--------------------------------------------------|--------------------------------------------------|---------------------------------------------------|-------------------|
| File#                                                | Spot#  | Pb ppm <sup>1</sup> | Th ppm <sup>1</sup> | U ppm <sup>1</sup> | Th/U | <sup>208</sup> Pb/ <sup>232</sup> Th <sup>2</sup> | 2 σ error<br><sup>208</sup> Pb/ <sup>232</sup> Th | <sup>206</sup> Pb/ <sup>238</sup> U <sup>2</sup> | 2 σ error<br><sup>206</sup> Pb/ <sup>238</sup> U | Age (Ma)<br><sup>208</sup> Pb/ <sup>232</sup> Th | 2 σ error<br><sup>208</sup> Pb/ <sup>232</sup> Th | Age<br>population |
| 05060711d                                            | 1c     | 138                 | 65356               | 25658              | 2,5  | 0,00111                                           | 0,00002                                           | 0,00352                                          | 0,00008                                          | 22,4                                             | 0,7                                               | 1                 |
| 07060711d                                            | 3c     | 76                  | 54902               | 7337               | 7,5  | 0,00109                                           | 0,00002                                           | 0,00364                                          | 0,00008                                          | 22,0                                             | 0,7                                               | 1                 |
| 09060711d                                            | 5cb    | 90                  | 55853               | 12102              | 4,6  | 0,00108                                           | 0,00002                                           | 0,00349                                          | 0,00008                                          | 21,9                                             | 0,7                                               | 1                 |
| 10060711d                                            | 6c     | 81                  | 56264               | 8167               | 6,9  | 0,00110                                           | 0,00002                                           | 0,00362                                          | 0,00008                                          | 22,3                                             | 0,7                                               | 1                 |
| 11060711d                                            | 7c     | 1516                | 75834               | 1636               | 46,3 | 0,02055                                           | 0,00040                                           | 0,06513                                          | 0,00146                                          | 411                                              | 12                                                | 2                 |
| 12060711d                                            | 8c     | 117                 | 63628               | 17459              | 3,6  | 0,00112                                           | 0,00002                                           | 0,00371                                          | 0,00008                                          | 22,6                                             | 0,7                                               | 1                 |
| 16060711d                                            | 10cb   | 89                  | 65189               | 7907               | 8,2  | 0,00110                                           | 0,00002                                           | 0,00362                                          | 0,00008                                          | 22,3                                             | 0,7                                               | 1                 |
| 17060711d                                            | 11.1b  | 100                 | 57481               | 15755              | 3,6  | 0,00107                                           | 0,00002                                           | 0,00348                                          | 0,00008                                          | 21,6                                             | 0,7                                               | 1                 |
| 18060711d                                            | 12c    | 85                  | 57174               | 9183               | 6,2  | 0,00112                                           | 0,00002                                           | 0,00359                                          | 0,00008                                          | 22,7                                             | 0,7                                               | 1                 |
| 20060711d                                            | 14c    | 100                 | 66744               | 11841              | 5,6  | 0,00106                                           | 0,00002                                           | 0,00366                                          | 0,00008                                          | 21,5                                             | 0,7                                               | 1                 |
| 22060711d                                            | 16.1cb | 77                  | 54234               | 7095               | 7,6  | 0,00112                                           | 0,00002                                           | 0,00363                                          | 0,00010                                          | 22,6                                             | 0,8                                               | 1                 |
| 25060711d                                            | 17.1cb | 157                 | 68024               | 30959              | 2,2  | 0,00112                                           | 0,00002                                           | 0,00351                                          | 0,00008                                          | 22,5                                             | 0,7                                               | 1                 |
| 27060711d                                            | 19.1b  | 82                  | 64564               | 6400               | 10,1 | 0,00106                                           | 0,00002                                           | 0,00369                                          | 0,00008                                          | 21,5                                             | 0,7                                               | 1                 |
| 28060711d                                            | 19.2cb | 83                  | 64969               | 6696               | 9,7  | 0,00106                                           | 0,00002                                           | 0,00370                                          | 0,00012                                          | 21,4                                             | 0,8                                               | 1                 |
| 29060711d                                            | 20c    | 76                  | 59619               | 5997               | 9,9  | 0,00106                                           | 0,00002                                           | 0,00368                                          | 0,00010                                          | 21,5                                             | 0,7                                               | 1                 |
| 30060711d                                            | 17.2c  | 95                  | 65442               | 11314              | 5,8  | 0,00107                                           | 0,00002                                           | 0,00346                                          | 0,00008                                          | 21,6                                             | 0,7                                               | 1                 |
| 31060711d                                            | 16.2c  | 128                 | 67163               | 23160              | 2,9  | 0,00106                                           | 0,00002                                           | 0,00342                                          | 0,00008                                          | 21,4                                             | 0,7                                               | 1                 |

| Table A21 (S3 in Liu et al., 2012): T11N37 monazites |       |                     |                     |                    |      |                                                   |                                                   |                                                  |                                                  |                                                  |                                                   |                   |
|------------------------------------------------------|-------|---------------------|---------------------|--------------------|------|---------------------------------------------------|---------------------------------------------------|--------------------------------------------------|--------------------------------------------------|--------------------------------------------------|---------------------------------------------------|-------------------|
| File#                                                | Spot# | Pb ppm <sup>1</sup> | Th ppm <sup>1</sup> | U ppm <sup>1</sup> | Th/U | <sup>208</sup> Pb/ <sup>232</sup> Th <sup>2</sup> | 2 σ error<br><sup>208</sup> Pb/ <sup>232</sup> Th | <sup>206</sup> Pb/ <sup>238</sup> U <sup>2</sup> | 2 σ error<br><sup>206</sup> Pb/ <sup>238</sup> U | Age (Ma)<br><sup>208</sup> Pb/ <sup>232</sup> Th | 2 σ error<br><sup>208</sup> Pb/ <sup>232</sup> Th | Age<br>population |
| 05070711d                                            | 01.1c | 144                 | 63953               | 14690              | 4,4  | 0,00151                                           | 0,00006                                           | 0,00472                                          | 0,00015                                          | 30,4                                             | 1,0                                               | 2                 |
| 06070711d                                            | 02.1c | 154                 | 59867               | 18882              | 3,2  | 0,00149                                           | 0,00006                                           | 0,00476                                          | 0,00015                                          | 30,2                                             | 0,9                                               | 2                 |
| 07070711d                                            | 02.2b | 129                 | 76817               | 9021               | 8,5  | 0,00137                                           | 0,00003                                           | 0,00438                                          | 0,00015                                          | 27,7                                             | 0,9                                               | 1                 |
| 08070711d                                            | 03c   | 160                 | 89189               | 13757              | 6,5  | 0,00137                                           | 0,00003                                           | 0,00435                                          | 0,00015                                          | 27,7                                             | 0,9                                               | 1                 |
| 09070711d                                            | 04.1c | 152                 | 59432               | 18535              | 3,2  | 0,00148                                           | 0,00006                                           | 0,00481                                          | 0,00015                                          | 29,8                                             | 0,9                                               | 2                 |
| 10070711d                                            | 04.2b | 139                 | 81895               | 10428              | 7,9  | 0,00136                                           | 0,00003                                           | 0,00440                                          | 0,00015                                          | 27,4                                             | 0,9                                               | 1                 |
| 11070711d                                            | 05.1c | 153                 | 85622               | 12832              | 6,7  | 0,00138                                           | 0,00003                                           | 0,00437                                          | 0,00015                                          | 27,8                                             | 0,9                                               | 1                 |
| 12070711d                                            | 05.2b | 140                 | 83999               | 10554              | 8,0  | 0,00134                                           | 0,00003                                           | 0,00435                                          | 0,00015                                          | 27,0                                             | 0,8                                               | 1                 |
| 15070711d                                            | 06.1c | 123                 | 71788               | 9458               | 7,6  | 0,00136                                           | 0,00003                                           | 0,00433                                          | 0,00015                                          | 27,4                                             | 0,9                                               | 1                 |
| 16070711d                                            | 06.2b | 139                 | 83305               | 10180              | 8,2  | 0,00136                                           | 0,00003                                           | 0,00434                                          | 0,00015                                          | 27,5                                             | 0,8                                               | 1                 |
| 17070711d                                            | 07c   | 155                 | 87280               | 13375              | 6,5  | 0,00135                                           | 0,00003                                           | 0,00430                                          | 0,00015                                          | 27,4                                             | 0,8                                               | 1                 |
| 18070711d                                            | 08.1c | 143                 | 81333               | 12279              | 6,6  | 0,00134                                           | 0,00003                                           | 0,00433                                          | 0,00015                                          | 27,1                                             | 0,8                                               | 1                 |
| 19070711d                                            | 08.2b | 144                 | 84851               | 11053              | 7,7  | 0,00134                                           | 0,00003                                           | 0,00442                                          | 0,00015                                          | 27,1                                             | 0,8                                               | 1                 |
| 20070711d                                            | 09.1c | 102                 | 57482               | 9534               | 6,0  | 0,00134                                           | 0,00006                                           | 0,00421                                          | 0,00018                                          | 27,1                                             | 1,0                                               | 1                 |
| 21070711d                                            | 09.2b | 145                 | 81951               | 12317              | 6,7  | 0,00136                                           | 0,00003                                           | 0,00433                                          | 0,00015                                          | 27,5                                             | 0,9                                               | 1                 |
| 22070711d                                            | 10.1c | 164                 | 76972               | 19785              | 3,9  | 0,00133                                           | 0,00003                                           | 0,00447                                          | 0,00015                                          | 26,9                                             | 0,9                                               | 1                 |
| 23070711d                                            | 10.2b | 134                 | 78876               | 10845              | 7,3  | 0,00135                                           | 0,00003                                           | 0,00428                                          | 0,00015                                          | 27,3                                             | 0,8                                               | 1                 |
| 26070711d                                            | 11b   | 135                 | 78424               | 11612              | 6,8  | 0,00132                                           | 0,00003                                           | 0,00437                                          | 0,00015                                          | 26,7                                             | 0,8                                               | 1                 |
| 27070711d                                            | 12b   | 136                 | 81796               | 10164              | 8,0  | 0,00136                                           | 0,00003                                           | 0,00428                                          | 0,00015                                          | 27,4                                             | 0,8                                               | 1                 |
| 28070711d                                            | 13.1c | 134                 | 62177               | 16245              | 3,8  | 0,00136                                           | 0,00003                                           | 0,00432                                          | 0,00015                                          | 27,5                                             | 0,9                                               | 1                 |
| 29070711d                                            | 13.2b | 139                 | 71585               | 13847              | 5,2  | 0,00138                                           | 0,00003                                           | 0,00440                                          | 0,00015                                          | 27,8                                             | 0,9                                               | 1                 |
| 31070711d                                            | 14.1c | 166                 | 63305               | 21830              | 2,9  | 0,00149                                           | 0,00006                                           | 0,00454                                          | 0,00015                                          | 30,1                                             | 0,9                                               | 2                 |
| 32070711d                                            | 15.1c | 142                 | 66272               | 13345              | 5,0  | 0,00149                                           | 0,00006                                           | 0,00479                                          | 0,00015                                          | 30,1                                             | 0,9                                               | 2                 |
| 33070711d                                            | 15.2b | 148                 | 83602               | 12386              | 6,7  | 0,00137                                           | 0,00003                                           | 0,00434                                          | 0,00015                                          | 27,6                                             | 0,9                                               | 1                 |
| 35290811e                                            | 01.2b | 147                 | 90041               | 10978              | 8,2  | 0,00133                                           | 0,00004                                           | 0,00426                                          | 0,00010                                          | 26,8                                             | 0,6                                               | 1                 |

Table A22

| Sample<br>Lithology |     | TIIN 09<br>Mig | TIIN 11<br>2mg | TIIN 33<br>2mg | TIIN 34<br>2mg | TIIN 39<br>2mg | TIIN 42<br>2mg | TIIN 32<br>Bg | TIIN 38<br>Bg | TIIN 45<br>Bg | TIIN 10<br>Lp | TIIN 37<br>Lp | TIIN 41<br>Lp | TIIN 44<br>Lp | TIIN 47<br>Lp | TIIN 25<br>Tg | TIIN 29<br>Tg | TIIN 30<br>Tg | TIIN 56<br>Tg |
|---------------------|-----|----------------|----------------|----------------|----------------|----------------|----------------|---------------|---------------|---------------|---------------|---------------|---------------|---------------|---------------|---------------|---------------|---------------|---------------|
| SiO2                | %   | 92.00          | 77.18          | 73.21          | 78.12          | 85.02          | 79.18          | 78.68         | 85.17         | 78.61         | 74.3          | 78.15         | 72.47         | 78.96         | 70.54         | 81.24         | 64.92         | 70.7          | 75.08         |
| TiO2                | %   | 0.12           | 0.08           | 0.09           | 0.14           | 0.09           | 0.08           | 0.1           | 0.05          | 0.1           | 0.02          | 0.23          | 0.39          | 0.09          | 0.29          | 0.03          | 0.25          | 0.24          | 0.22          |
| Al2O3               | %   | 4.43           | 12.99          | 14.63          | 11.89          | 8.13           | 12.64          | 11.32         | 8.44          | 12.66         | 15.87         | 12.87         | 13.44         | 11.09         | 14.46         | 10.67         | 20.68         | 16.9          | 14.64         |
| Fe2O3               | %   | 0.97           | 0.68           | 0.89           | 1.23           | 1.15           | 0.61           | 0.4           | 0.32          | 0.92          | 0.23          | 1.41          | 2.23          | 0.66          | 1.86          | 0.78          | 1.49          | 2.07          | 1.56          |
| MnO                 | %   | 0.01           | 0.01           | 0.02           | 0.02           | 0.02           | 0.01           | 0.01          | 0.01          | 0.02          | 0.00          | 0.01          | 0.02          | 0.01          | 0.02          | 0.09          | 0.05          | 0.04          | 0.02          |
| MgO                 | %   | 0.2            | 0.16           | 0.19           | 0.29           | 0.18           | 0.13           | 0.08          | 0.09          | 0.18          | 0.03          | 0.44          | 0.96          | 0.19          | 0.74          | 0.04          | 0.36          | 0.56          | 0.47          |
| CaO                 | %   | 0.44           | 0.92           | 0.64           | 0.6            | 0.3            | 0.48           | 0.48          | 0.33          | 0.73          | 3.08          | 0.81          | 0.83          | 0.2           | 0.64          | 0.31          | 0.32          | 0.31          | 0.24          |
| Na2O                | %   | 1.22           | 2.94           | 3.21           | 2.35           | 1.36           | 2.72           | 1.84          | 1.34          | 2.47          | 4.06          | 1.79          | 2.5           | 1.62          | 2.54          | 2.6           | 2.69          | 2.48          | 1.63          |
| K2O                 | %   | 0.91           | 5.28           | 6.69           | 3.96           | 3.59           | 3.42           | 6.45          | 4.71          | 3.79          | 2.25          | 4.15          | 5.71          | 6.76          | 7.5           | 4.32          | 6.31          | 4.55          | 3.94          |
| P2O5                | %   | 0.03           | 0.09           | 0.1            | 0.07           | 0.06           | 0.09           | 0.06          | 0.07          | 0.1           | 0.07          | 0.03          | 0.06          | 0.06          | 0.07          | 0.05          | 0.05          | 0.05          | 0.06          |
| LOI                 | %   | 0.21           | 0.25           | 0.32           | 0.47           | 0.29           | 0.77           | 0.16          | 0.16          | 0.35          | 0.36          | 0.3           | 0.43          | 0.21          | 0.34          | 0.29          | 1.93          | 1.3           | 1.23          |
| H2O-                | %   | 0.07           | 0.08           | 0.1            | 0.08           | 0.07           | 0.1            | 0.05          | 0.04          | 0.09          | 0.12          | 0.1           | 0.07          | 0.07          | 0.07          | 0.06          | 0.13          | 0.1           | 0.07          |
| Total               | %   | 100.61         | 100.66         | 100.09         | 99.22          | 100.26         | 100.23         | 99.63         | 100.73        | 100.02        | 100.39        | 100.29        | 99.11         | 99.92         | 99.07         | 100.48        | 99.18         | 99.3          | 99.16         |
| Ba                  | ppm | 260.4          | 416.9          | 518.2          | 338.1          | 279.1          | 96.4           | 378.6         | 894.3         | 115.9         | 389.00        | 255.9         | 927.00        | 835.3         | 789.3         | 82.4          | 117.1         | 136.4         | 117.7         |
| Rb                  | ppm | 39.2           | 161.5          | 296.00         | 158.00         | 176.1          | 157.4          | 213.7         | 135.9         | 130.00        | 106.2         | 178.5         | 236.1         | 255.8         | 270.6         | 518.00        | 681.4         | 397.9         | 348.5         |
| Sr                  | ppm | 90.9           | 214.4          | 124.5          | 94.6           | 59.6           | 75.7           | 103.1         | 163.7         | 101.00        | 316.9         | 88.9          | 272.5         | 156.9         | 209.6         | 27.4          | 35.00         | 41.4          | 31.9          |
| Zr                  | ppm | 85.8           | 29.8           | 52.00          | 39.2           | 33.4           | 18.2           | 69.4          | 62.8          | 26.2          | 15.2          | 17.6          | 37.5          | 20.1          | 7.6           | 14.6          | 32.4          | 38.4          | 50.00         |
| Nb                  | ppm | 3.6            | 6.00           | 6.5            | 7.9            | 10.6           | 13.3           | 4.5           | 2.00          | 7.3           | 1.9           | 13.7          | 10.2          | 3.6           | 9.1           | 21.9          | 32.00         | 12.3          | 21.2          |
| Y                   | ppm | 7.8            | 6.00           | 9.8            | 11.5           | 10.2           | 8.4            | 10.00         | 4.2           | 10.7          | 2.6           | 15.2          | 2.1           | 2.1           | 2.2           | 4.00          | 4.8           | 4.00          | 7.5           |
| V                   | ppm | 13.5           | 6.6            | 9.00           | 12.9           | 9.00           | 3.1            | 2.6           | 7.2           | 3.3           | 5.6           | 13.4          | 35.2          | 14.8          | 20.7          | 6.9           | 11.1          | 12.1          | 17.8          |
| Cr                  | ppm | 9.00           | 8.4            | 0.00           | 6.8            | 0.9            | 0.00           | 0.00          | 0.00          | 0.00          | 0.00          | 3.5           | 1.7           | 0.00          | 0.00          | 0.00          | 2.8           | 1.1           | 2.4           |
| Ni                  | ppm | 4.2            | 2.9            | 1.5            | 2.00           | 0.9            | 0.8            | 1.2           | 0.8           | 0.4           | 0.8           | 3.8           | 8.8           | 2.00          | 3.3           | 1.7           | 3.7           | 1.5           | 3.1           |
| Sc                  | ppm | 2.2            | 2.6            | 3.6            | 8.5            | 6              | 8.1            | 3.3           | 1.7           | 3.9           | 2             | 10.7          | 5.2           | 1             | 5             | 0.2           | 4.6           | 8.5           | 8.6           |
| Pb                  | ppm | 9.8            | 68.1           | 71.6           | 60.8           | 47.2           | 47.2           | 52.6          | 82.8          | 69.7          | 11.9          | 35.8          | 55.6          | 54.9          | 62.9          | 26.00         | 30.7          | 28.6          | 28.1          |

LOI: Lost Of Ignous, 2mg: two micas leucogranite, Bg: biotite leucogranite, Lp: leucopogmatite, Mig: Migmatite, Tg: tourmaline leucogranite.

| Sample  | Temperature | 36Ar<br>[V] | %1σ    | 37Ar<br>[V] | %1σ      | 38Ar<br>[V] | %1σ    | 39Ar<br>[V] | %1σ   | 40Ar<br>[V] | %1σ   | 40(r)/39(k) ± 2σ  | Age ± 2σ<br>(Ma) | 40Ar(r)<br>(%) | 39Ar(k)<br>(%) |
|---------|-------------|-------------|--------|-------------|----------|-------------|--------|-------------|-------|-------------|-------|-------------------|------------------|----------------|----------------|
| T11N01a | 500 °C      | 0,0002570   | 36,011 | 0,0000787   | 577,183  | 0,0000544   | 71,053 | 0,0007552   | 1,708 | 0,0605856   | 1,449 | - -               | - -              | - -            | 0,05           |
| T11N01a | 700 °C      | 0,0005222   | 17,879 | -           | 279,568  | 0,0003422   | 11,567 | 0,0158914   | 0,640 | 0,1782516   | 0,557 | 1,49583 ± 3,47530 | 10,67 ± 24,71    | 13,34          | 1,01           |
| T11N01a | 750 °C      | 0,0005036   | 18,490 | -           | 670,938  | 0,0004389   | 9,466  | 0,0251730   | 0,855 | 0,1711964   | 0,994 | 0,87912 ± 2,19079 | 6,28 ± 15,62     | 12,93          | 1,60           |
| T11N01a | 800 °C      | 0,0002101   | 44,002 | -           | 3257,533 | 0,0004333   | 9,544  | 0,0388770   | 0,598 | 0,0749399   | 1,273 | 0,32069 ± 1,40652 | 2,29 ± 10,05     | 16,64          | 2,48           |
| T11N01a | 833 °C      | 0,0002949   | 31,406 | 0,0000765   | 594,520  | 0,0008383   | 4,731  | 0,0650933   | 0,587 | 0,1111994   | 0,838 | 0,36011 ± 0,84136 | 2,57 ± 6,01      | 21,08          | 4,15           |
| T11N01a | 866 °C      | 0,0005527   | 16,835 | -           | 232,511  | 0,0023478   | 3,349  | 0,1914016   | 0,556 | 0,3005277   | 0,371 | 0,70714 ± 0,28769 | 5,05 ± 2,05      | 45,04          | 12,20          |
| T11N01a | 900 °C      | 0,0006498   | 14,445 | 0,0004665   | 97,584   | 0,0019095   | 3,699  | 0,1805069   | 0,531 | 0,2983337   | 0,324 | 0,57960 ± 0,30763 | 4,14 ± 2,20      | 35,07          | 11,51          |
| T11N01a | 933 °C      | 0,0005104   | 18,227 | -           | 143,016  | 0,0022880   | 2,458  | 0,1908016   | 0,540 | 0,2805057   | 0,350 | 0,66977 ± 0,28851 | 4,78 ± 2,06      | 45,56          | 12,16          |
| T11N01a | 966 °C      | 0,0004967   | 18,732 | 0,0001027   | 442,506  | 0,0021950   | 4,891  | 0,1789905   | 0,588 | 0,2613850   | 0,339 | 0,63063 ± 0,30753 | 4,51 ± 2,19      | 43,18          | 11,41          |
| T11N01a | 1000 °C     | 0,0004051   | 22,893 | 0,0000162   | 2817,653 | 0,0018686   | 3,376  | 0,1580416   | 0,563 | 0,2311050   | 0,555 | 0,69516 ± 0,34733 | 4,97 ± 2,48      | 47,54          | 10,07          |
| T11N01a | 1050 °C     | 0,0003273   | 28,429 | 0,0001311   | 347,408  | 0,0017562   | 8,142  | 0,1754152   | 0,601 | 0,2199055   | 0,445 | 0,69268 ± 0,31380 | 4,95 ± 2,24      | 55,25          | 11,18          |
| T11N01a | 1100 °C     | 0,0002253   | 41,162 | -           | 183,625  | 0,0020805   | 8,500  | 0,1998073   | 0,527 | 0,2151913   | 0,403 | 0,73393 ± 0,27461 | 5,24 ± 1,96      | 68,15          | 12,74          |
| T11N01a | 1200 °C     | 0,0002304   | 40,203 | 0,0002221   | 204,601  | 0,0012288   | 4,055  | 0,1127572   | 0,560 | 0,1499962   | 0,589 | 0,71703 ± 0,48576 | 5,12 ± 3,47      | 53,90          | 7,19           |
| T11N01a | 1400 °C     | 0,0006335   | 14,792 | 0,0002663   | 170,860  | 0,0004547   | 10,308 | 0,0315992   | 0,528 | 0,2640212   | 0,511 | 2,42215 ± 1,75534 | 17,24 ± 12,44    | 28,99          | 2,01           |
| T11N01a | 1450 °C     | 0,0004722   | 19,752 | -           | 1116,682 | 0,0001567   | 25,121 | 0,0036009   | 1,800 | 0,1342329   | 0,651 | - -               | - -              | - -            | 0,23           |

Table A23

| Sample  | Temperature | <sup>36</sup> Ar<br>[V] | %1σ    | <sup>37</sup> Ar<br>[V] | %1σ     | <sup>38</sup> Ar<br>[V] | %1σ    | <sup>39</sup> Ar<br>[V] | %1σ    | <sup>40</sup> Ar<br>[V] | %1σ   | 40(r)/39(k) ± 2σ    | Age ± 2σ<br>(Ma) | 40Ar(r)<br>(%) | 39Ar(k)<br>(%) |
|---------|-------------|-------------------------|--------|-------------------------|---------|-------------------------|--------|-------------------------|--------|-------------------------|-------|---------------------|------------------|----------------|----------------|
| T11N01b | 500 °C      | 0,0007614               | 8,761  | 0,0005273               | 32,876  | 0,0001979               | 22,826 | 0,0017164               | 4,635  | 0,2385437               | 0,505 | 7,91554 ± 23,04717  | 55,76 ± 159,86   | 5,69           | 0,16           |
| T11N01b | 400 °C      | 0,0005531               | 12,102 | 0,0001764               | 103,437 | 0,0001409               | 32,824 | 0,0007849               | 10,210 | 0,1721236               | 0,549 | 11,06848 ± 50,53672 | 77,49 ± 346,35   | 5,05           | 0,07           |
| T11N01b | 600 °C      | 0,0007982               | 8,390  | 0,0003492               | 49,688  | 0,0001323               | 34,707 | 0,0035724               | 2,423  | 0,2464759               | 0,400 | 2,96813 ± 11,10479  | 21,11 ± 78,52    | 4,30           | 0,33           |
| T11N01b | 700 °C      | 0,0010410               | 6,549  | 0,0006547               | 26,715  | 0,0004074               | 12,176 | 0,0140799               | 0,756  | 0,3485805               | 0,293 | 2,90421 ± 2,86999   | 20,66 ± 20,30    | 11,73          | 1,32           |
| T11N01b | 750 °C      | 0,0004484               | 14,571 | 0,0000700               | 248,798 | 0,0002423               | 18,962 | 0,0117707               | 0,876  | 0,1557619               | 0,571 | 1,96786 ± 3,28494   | 14,02 ± 23,32    | 14,87          | 1,10           |
| T11N01b | 800 °C      | 0,0002436               | 26,557 | 0,0003038               | 56,582  | 0,0002999               | 15,190 | 0,0276075               | 0,675  | 0,0907037               | 0,964 | 0,66894 ± 1,38671   | 4,78 ± 9,89      | 20,36          | 2,59           |
| T11N01b | 833 °C      | 0,0002209               | 29,256 | 0,0004577               | 37,783  | 0,0003157               | 14,615 | 0,0311563               | 0,592  | 0,1051951               | 0,839 | 1,27245 ± 1,22762   | 9,08 ± 8,74      | 37,69          | 2,92           |
| T11N01b | 866 °C      | 0,0006877               | 9,674  | 0,0001507               | 114,108 | 0,0012042               | 4,520  | 0,0965833               | 0,535  | 0,2858947               | 0,342 | 0,84644 ± 0,40798   | 6,04 ± 2,91      | 28,60          | 9,05           |
| T11N01b | 900 °C      | 0,0010479               | 6,489  | 0,0001987               | 85,931  | 0,0023545               | 2,345  | 0,1988907               | 0,523  | 0,4959350               | 0,224 | 0,92697 ± 0,20290   | 6,62 ± 1,45      | 37,18          | 18,63          |
| T11N01b | 933 °C      | 0,0007067               | 9,387  | 0,0004244               | 40,568  | 0,0019460               | 2,950  | 0,1608886               | 0,532  | 0,3379173               | 0,267 | 0,79282 ± 0,24428   | 5,66 ± 1,74      | 37,75          | 15,07          |
| T11N01b | 966 °C      | 0,0004443               | 14,695 | 0,0000676               | 256,208 | 0,0013092               | 4,279  | 0,1111703               | 0,542  | 0,2291009               | 0,394 | 0,87024 ± 0,34768   | 6,21 ± 2,48      | 42,23          | 10,41          |
| T11N01b | 1000 °C     | 0,0002935               | 22,105 | 0,0007508               | 23,092  | 0,0009986               | 5,732  | 0,0785001               | 0,523  | 0,1649189               | 0,535 | 0,98708 ± 0,48918   | 7,05 ± 3,49      | 46,98          | 7,35           |
| T11N01b | 1050 °C     | 0,0002683               | 24,233 | 0,0001185               | 145,208 | 0,0011667               | 4,205  | 0,0953137               | 0,547  | 0,1610547               | 0,606 | 0,84826 ± 0,40386   | 6,06 ± 2,88      | 50,20          | 8,93           |
| T11N01b | 1100 °C     | 0,0001829               | 35,349 | -                       | 666,318 | 0,0011863               | 11,298 | 0,1324668               | 0,525  | 0,1747304               | 0,504 | 0,90142 ± 0,28887   | 6,44 ± 2,06      | 68,34          | 12,41          |
| T11N01b | 1200 °C     | 0,0001075               | 60,014 | 0,0005262               | 33,068  | 0,0008451               | 6,891  | 0,0724989               | 0,529  | 0,1001663               | 0,881 | 0,93425 ± 0,52677   | 6,67 ± 3,75      | 67,62          | 6,79           |
| T11N01b | 1400 °C     | 0,0005325               | 12,372 | -                       | 394,612 | 0,0003378               | 13,983 | 0,0262180               | 0,625  | 0,2352606               | 0,385 | 2,96115 ± 1,48785   | 21,06 ± 10,52    | 33,00          | 2,46           |
| T11N01b | 1450 °C     | 0,0002802               | 23,240 | 0,0005190               | 33,267  | 0,0001128               | 40,842 | 0,0043730               | 2,206  | 0,0956077               | 0,924 | 2,92765 ± 8,81364   | 20,82 ± 62,33    | 13,39          | 0,41           |

Table A24



| Sample | Temperature | 36Ar<br>[V] | %1 $\sigma$ | 37Ar<br>[V] | %1 $\sigma$ | 38Ar<br>[V] | %1 $\sigma$ | 39Ar<br>[V] | %1 $\sigma$ | 40Ar<br>[V] | %1 $\sigma$ | 40(r)/39(k) $\pm 2\sigma$ | Age $\pm 2\sigma$<br>(Ma) | 40Ar(r)<br>(%) | 39Ar(k)<br>(%) |
|--------|-------------|-------------|-------------|-------------|-------------|-------------|-------------|-------------|-------------|-------------|-------------|---------------------------|---------------------------|----------------|----------------|
| T11N03 | 400 °C      | 0,0008460   | 6,300       | 0,0003814   | 19,688      | 0,0003473   | 23,382      | 0,0016316   | 6,392       | 0,2574943   | 0,528       | 4,62676 $\pm$ 19,41783    | 32,80 $\pm$ 136,41        | 2,93           | 0,15           |
| T11N03 | 500 °C      | 0,0008826   | 6,224       | 0,0004227   | 16,147      | 0,0003271   | 25,356      | 0,0023815   | 4,778       | 0,2626974   | 0,534       | 0,80399 $\pm$ 13,70660    | 5,74 $\pm$ 97,74          | 0,73           | 0,23           |
| T11N03 | 600 °C      | 0,0008815   | 6,247       | 0,0005387   | 12,103      | 0,0003659   | 22,523      | 0,0055205   | 2,388       | 0,2770829   | 0,494       | 3,00682 $\pm$ 5,92785     | 21,38 $\pm$ 41,91         | 5,99           | 0,52           |
| T11N03 | 700 °C      | 0,0020363   | 6,032       | -           | 66,918      | 0,0023340   | 4,593       | 0,0825308   | 1,527       | 0,7556523   | 0,398       | 1,85646 $\pm$ 0,88597     | 13,23 $\pm$ 6,29          | 20,28          | 7,82           |
| T11N03 | 750 °C      | 0,0016584   | 6,076       | -           | 125,965     | 0,0043713   | 3,710       | 0,1784068   | 1,477       | 0,7857646   | 0,226       | 1,64897 $\pm$ 0,33845     | 11,76 $\pm$ 2,41          | 37,44          | 16,90          |
| T11N03 | 800 °C      | 0,0004148   | 6,949       | -           | 14,624      | 0,0050632   | 5,102       | 0,2628165   | 1,490       | 0,5255690   | 0,289       | 1,52430 $\pm$ 0,08007     | 10,87 $\pm$ 0,57          | 76,22          | 24,90          |
| T11N03 | 833 °C      | 0,0003288   | 7,654       | -           | 13,178      | 0,0037267   | 3,760       | 0,1735811   | 1,480       | 0,3564891   | 0,387       | 1,48504 $\pm$ 0,09769     | 10,59 $\pm$ 0,69          | 72,31          | 16,45          |
| T11N03 | 866 °C      | 0,0001953   | 10,208      | -           | 60,952      | 0,0014251   | 7,885       | 0,0816073   | 1,483       | 0,1784179   | 0,743       | 1,46993 $\pm$ 0,15433     | 10,48 $\pm$ 1,10          | 67,23          | 7,73           |
| T11N03 | 900 °C      | 0,0000994   | 15,907      | -           | 42,694      | 0,0008479   | 11,639      | 0,0444566   | 1,491       | 0,1069039   | 1,222       | 1,73452 $\pm$ 0,22441     | 12,37 $\pm$ 1,59          | 72,13          | 4,21           |
| T11N03 | 933 °C      | 0,0001152   | 17,960      | -           | 8,024       | 0,0006456   | 13,136      | 0,0298959   | 1,531       | 0,0844095   | 1,547       | 1,67338 $\pm$ 0,42138     | 11,93 $\pm$ 2,99          | 59,27          | 2,83           |
| T11N03 | 966 °C      | 0,0001654   | 11,774      | -           | 18,946      | 0,0005605   | 14,671      | 0,0277904   | 1,516       | 0,0915363   | 1,427       | 1,52483 $\pm$ 0,42742     | 10,88 $\pm$ 3,04          | 46,29          | 2,63           |
| T11N03 | 1000 °C     | 0,0001440   | 12,835      | 0,0000311   | 210,515     | 0,0005954   | 14,622      | 0,0267908   | 1,525       | 0,0871126   | 1,503       | 1,65476 $\pm$ 0,42241     | 11,80 $\pm$ 3,00          | 50,89          | 2,54           |
| T11N03 | 1050 °C     | 0,0000435   | 36,922      | -           | 12,043      | 0,0010502   | 8,484       | 0,0523652   | 1,486       | 0,1050953   | 1,266       | 1,75165 $\pm$ 0,19542     | 12,49 $\pm$ 1,39          | 87,28          | 4,96           |
| T11N03 | 1100 °C     | 0,0000855   | 19,014      | -           | 20,043      | 0,0011198   | 8,696       | 0,0505028   | 1,498       | 0,0980392   | 1,330       | 1,43200 $\pm$ 0,20171     | 10,21 $\pm$ 1,43          | 73,77          | 4,79           |
| T11N03 | 1200 °C     | 0,0000312   | 56,181      | -           | 21,629      | 0,0005924   | 14,202      | 0,0301392   | 1,515       | 0,0703075   | 1,864       | 2,01705 $\pm$ 0,35987     | 14,37 $\pm$ 2,55          | 86,47          | 2,86           |
| T11N03 | 1400 °C     | 0,0001226   | 14,391      | -           | 12,748      | 0,0001174   | 68,310      | 0,0049697   | 2,558       | 0,0693183   | 1,891       | 6,63987 $\pm$ 2,19053     | 46,89 $\pm$ 15,27         | 47,61          | 0,47           |

Table A25

| Sample  | Temperature | <sup>36</sup> Ar [V] | %1σ    | <sup>37</sup> Ar [V] | %1σ      | <sup>38</sup> Ar [V] | %1σ     | <sup>39</sup> Ar [V] | %1σ    | <sup>40</sup> Ar [V] | %1σ    | 40(r)/39(k) ± 2σ    | Age ± 2σ (Ma)  | 40Ar(r) (%) | 39Ar(k) (%) |
|---------|-------------|----------------------|--------|----------------------|----------|----------------------|---------|----------------------|--------|----------------------|--------|---------------------|----------------|-------------|-------------|
| T11NO5a | 500 °C      | 0,0003411            | 18,947 | -                    | 188,258  | 0,0001236            | 85,892  | 0,0005825            | 26,987 | 0,1017488            | 22,665 | 1,61286 ± 102,77221 | 11,50 ± 730,52 | 0,92        | 0,04        |
| T11NO5a | 500 °C      | 0,0007097            | 6,536  | -                    | 211,642  | 0,0004223            | 24,152  | 0,0027905            | 3,102  | 0,1867920            | 0,612  | - -                 | -              | -           | 0,18        |
| T11NO5a | 600 °C      | 0,0008174            | 6,198  | -                    | 1328,249 | 0,0004066            | 25,290  | 0,0072002            | 2,382  | 0,2220454            | 0,707  | - -                 | -              | -           | 0,46        |
| T11NO5a | 700 °C      | 0,0007926            | 6,339  | -                    | 265,331  | 0,0003775            | 27,483  | 0,0196144            | 1,612  | 0,2516879            | 0,406  | 0,87988 ± 1,52009   | 6,28 ± 10,84   | 6,86        | 1,24        |
| T11NO5a | 750 °C      | 0,0003650            | 7,086  | 0,0001224            | 472,029  | 0,0003827            | 26,836  | 0,0272992            | 1,522  | 0,1497451            | 0,623  | 1,52562 ± 0,56660   | 10,88 ± 4,03   | 27,81       | 1,73        |
| T11NO5a | 800 °C      | 0,0005247            | 6,462  | -                    | 107,439  | 0,0008831            | 11,957  | 0,0622931            | 1,484  | 0,2216645            | 0,467  | 1,05883 ± 0,32539   | 7,56 ± 2,32    | 29,76       | 3,95        |
| T11NO5a | 833 °C      | 0,0005355            | 6,470  | -                    | 1348,745 | 0,0011349            | 15,948  | 0,1184201            | 1,505  | 0,2974992            | 0,334  | 1,16622 ± 0,17748   | 8,32 ± 1,26    | 46,42       | 7,51        |
| T11NO5a | 866 °C      | 0,0005201            | 6,500  | -                    | 377,428  | 0,0011414            | 9,587   | 0,1041706            | 1,483  | 0,2865957            | 0,325  | 1,26615 ± 0,19651   | 9,03 ± 1,40    | 46,02       | 6,60        |
| T11NO5a | 900 °C      | 0,0007002            | 6,405  | -                    | 194,597  | 0,0014998            | 11,441  | 0,1483292            | 1,515  | 0,4083432            | 0,261  | 1,34823 ± 0,18412   | 9,62 ± 1,31    | 48,97       | 9,40        |
| T11NO5a | 933 °C      | 0,0006241            | 6,408  | -                    | 194,470  | 0,0023701            | 7,375   | 0,2199702            | 1,487  | 0,4713562            | 0,247  | 1,29462 ± 0,11478   | 9,24 ± 0,82    | 60,42       | 13,94       |
| T11NO5a | 966 °C      | 0,0005486            | 6,691  | -                    | 228,656  | 0,0017115            | 11,932  | 0,1536484            | 1,510  | 0,3393657            | 0,344  | 1,14389 ± 0,14632   | 8,16 ± 1,04    | 51,79       | 9,74        |
| T11NO5a | 1000 °C     | 0,0004918            | 6,847  | -                    | 1366,244 | 0,0010208            | 19,062  | 0,1154919            | 2,208  | 0,2739149            | 1,739  | 1,10355 ± 0,19737   | 7,88 ± 1,41    | 46,53       | 7,32        |
| T11NO5a | 1050 °C     | 0,0000828            | 72,963 | -                    | 540,685  | 0,0000516            | 541,059 | 0,0650057            | 8,684  | 0,1224857            | 15,797 | 1,49782 ± 0,85090   | 10,68 ± 6,05   | 79,49       | 4,12        |
| T11NO5a | 1100 °C     | 0,0004091            | 7,663  | -                    | 167,057  | 0,0017354            | 23,488  | 0,1657308            | 1,727  | 0,3271845            | 1,532  | 1,23485 ± 0,13419   | 8,81 ± 0,96    | 62,55       | 10,51       |
| T11NO5a | 1200 °C     | 0,0004814            | 10,388 | -                    | 3099,272 | 0,0025168            | 20,520  | 0,3539706            | 2,364  | 0,5949985            | 1,137  | 1,26935 ± 0,10974   | 9,06 ± 0,78    | 75,52       | 22,44       |
| T11NO5a | 1400 °C     | -                    | 29,706 | -                    | 183,962  | -                    | 213,970 | 0,0129828            | 9,997  | 0,0506594            | 23,778 | 6,17421 ± 2,60939   | 43,64 ± 18,22  | 158,23      | 0,82        |

Table A26

| Sample  | Temperature | 36Ar<br>[V] | %1σ     | 37Ar<br>[V] | %1σ     | 38Ar<br>[V] | %1σ     | 39Ar<br>[V] | %1σ   | 40Ar<br>[V] | %1σ    | 40(r)/39(k) ± 2σ   | Age ± 2σ<br>(Ma) | 40Ar(r)<br>(%) | 39Ar(k)<br>(%) |
|---------|-------------|-------------|---------|-------------|---------|-------------|---------|-------------|-------|-------------|--------|--------------------|------------------|----------------|----------------|
| T11NO5b | 500 °C      | -           | 79,400  | 0,0002153   | 204,335 | -           | 126,657 | 0,0012417   | 2,648 | -           | 1,897  | 5,62508 ± 21,06215 | 39,80 ± 147,39   | -              | 0,12           |
| T11NO5b | 500 °C      | 0,0000977   | 45,402  | 0,0005178   | 85,178  | 0,0000544   | 60,724  | 0,0013621   | 2,239 | 0,0193765   | 1,325  | - -                | - -              | -              | 0,13           |
| T11NO5b | 600 °C      | 0,0000375   | 117,300 | -           | 275,286 | -           | 296,289 | 0,0015263   | 2,203 | -           | 10,777 | - -                | - -              | 640,35         | 0,15           |
| T11NO5b | 800 °C      | 0,0004872   | 10,885  | 0,0005364   | 82,076  | 0,0005664   | 7,452   | 0,0363432   | 1,496 | 0,2314892   | 0,225  | 2,39943 ± 0,86639  | 17,08 ± 6,14     | 37,67          | 3,55           |
| T11NO5b | 833 °C      | 0,0001716   | 26,445  | 0,0003038   | 145,208 | 0,0004516   | 8,026   | 0,0318635   | 1,480 | 0,1265916   | 0,162  | 2,37309 ± 0,84460  | 16,90 ± 5,99     | 59,73          | 3,11           |
| T11NO5b | 866 °C      | 0,0004297   | 11,900  | 0,0008150   | 54,493  | 0,0009359   | 4,806   | 0,0699891   | 1,485 | 0,3018761   | 0,133  | 2,49031 ± 0,43842  | 17,73 ± 3,11     | 57,74          | 6,84           |
| T11NO5b | 900 °C      | 0,0007768   | 8,306   | 0,0005729   | 77,031  | 0,0013095   | 5,204   | 0,1264726   | 1,484 | 0,5390039   | 0,208  | 2,43754 ± 0,31083  | 17,35 ± 2,20     | 57,19          | 12,36          |
| T11NO5b | 933 °C      | 0,0008879   | 7,755   | 0,0006184   | 71,269  | 0,0024220   | 3,342   | 0,1864235   | 1,486 | 0,7142723   | 0,160  | 2,41466 ± 0,23032  | 17,19 ± 1,63     | 63,02          | 18,22          |
| T11NO5b | 966 °C      | 0,0007549   | 8,381   | 0,0008561   | 51,620  | 0,0019796   | 3,716   | 0,1604556   | 1,488 | 0,6248042   | 0,178  | 2,49453 ± 0,24514  | 17,76 ± 1,74     | 64,06          | 15,68          |
| T11NO5b | 1000 °C     | 0,0006773   | 8,851   | 0,0002230   | 197,330 | 0,0014176   | 3,991   | 0,1136833   | 1,485 | 0,4738329   | 0,161  | 2,39799 ± 0,32020  | 17,07 ± 2,27     | 57,53          | 11,11          |
| T11NO5b | 1050 °C     | 0,0005633   | 9,813   | 0,0003940   | 111,676 | 0,0012272   | 4,173   | 0,0957522   | 1,487 | 0,4019763   | 0,159  | 2,45028 ± 0,34934  | 17,44 ± 2,48     | 58,37          | 9,36           |
| T11NO5b | 1100 °C     | 0,0006269   | 9,238   | 0,0006449   | 68,324  | 0,0012955   | 3,939   | 0,1023281   | 1,486 | 0,4197876   | 0,217  | 2,28293 ± 0,34200  | 16,26 ± 2,42     | 55,65          | 10,00          |
| T11NO5b | 1200 °C     | 0,0004340   | 11,783  | 0,0002490   | 176,753 | 0,0009592   | 6,055   | 0,0958933   | 1,482 | 0,3360597   | 0,146  | 2,15751 ± 0,32193  | 15,37 ± 2,28     | 61,56          | 9,37           |

Table A27

| Sample | Temperature | <sup>36</sup> Ar<br>[V] | %1σ   | <sup>37</sup> Ar<br>[V] | %1σ      | <sup>38</sup> Ar<br>[V] | %1σ   | <sup>39</sup> Ar<br>[V] | %1σ   | <sup>40</sup> Ar<br>[V] | %1σ   | <sup>40</sup> (r)/ <sup>39</sup> (k) ± 2σ | Age ± 2σ<br>(Ma) | <sup>40</sup> Ar(r)<br>(%) | <sup>39</sup> Ar(k)<br>(%) |
|--------|-------------|-------------------------|-------|-------------------------|----------|-------------------------|-------|-------------------------|-------|-------------------------|-------|-------------------------------------------|------------------|----------------------------|----------------------------|
| T11N07 | 500 °C      | 0,0039833               | 3,297 | 0,0007507               | 157,064  | 0,0034706               | 4,001 | 0,2216355               | 0,808 | 1,638898                | 0,154 | 2,07441 ± 0,35448                         | 14,78 ± 2,52     | 28,05                      | 11,07                      |
| T11N07 | 833 °C      | 0,0010987               | 3,782 | 0,0005386               | 218,923  | 0,0017008               | 4,726 | 0,1279229               | 0,817 | 0,598712                | 0,219 | 2,13292 ± 0,19699                         | 15,19 ± 1,40     | 45,57                      | 6,39                       |
| T11N07 | 866 °C      | 0,0017779               | 3,503 | 0,0005174               | 227,899  | 0,0021870               | 4,003 | 0,1760167               | 0,848 | 0,885076                | 0,270 | 2,03420 ± 0,21467                         | 14,49 ± 1,52     | 40,45                      | 8,79                       |
| T11N07 | 900 °C      | 0,0023913               | 3,359 | -                       | 1019,201 | 0,0027030               | 3,656 | 0,2022584               | 0,852 | 1,139306                | 0,268 | 2,12946 ± 0,24067                         | 15,17 ± 1,71     | 37,80                      | 10,10                      |
| T11N07 | 933 °C      | 0,0024102               | 6,042 | 0,0001674               | 704,296  | 0,0033728               | 5,485 | 0,2765383               | 1,480 | 1,307706                | 0,173 | 2,14376 ± 0,31858                         | 15,27 ± 2,26     | 45,33                      | 13,81                      |
| T11N07 | 966 °C      | 0,0016987               | 6,104 | 0,0006545               | 180,235  | 0,0029748               | 3,854 | 0,2318831               | 1,475 | 0,983826                | 0,146 | 2,06859 ± 0,27191                         | 14,74 ± 1,93     | 48,76                      | 11,58                      |
| T11N07 | 1000 °C     | 0,0015742               | 6,119 | 0,0005750               | 205,109  | 0,0023187               | 4,207 | 0,1710840               | 1,485 | 0,826614                | 0,188 | 2,10328 ± 0,33960                         | 14,98 ± 2,41     | 43,53                      | 8,54                       |
| T11N07 | 1050 °C     | 0,0017282               | 6,110 | 0,0011369               | 103,794  | 0,0025082               | 4,019 | 0,1811414               | 1,474 | 0,901495                | 0,141 | 2,14842 ± 0,35114                         | 15,30 ± 2,49     | 43,17                      | 9,04                       |
| T11N07 | 1100 °C     | 0,0017918               | 6,118 | 0,0007894               | 149,419  | 0,0025023               | 4,162 | 0,1844979               | 1,480 | 0,935401                | 0,197 | 2,19088 ± 0,35823                         | 15,60 ± 2,54     | 43,21                      | 9,21                       |
| T11N07 | 1200 °C     | 0,0015788               | 6,125 | 0,0003180               | 370,844  | 0,0030141               | 3,770 | 0,2298607               | 1,495 | 1,006684                | 0,213 | 2,34031 ± 0,25938                         | 16,66 ± 1,84     | 53,44                      | 11,48                      |

Table A28

| Sample | Temperature | 36Ar<br>[V] | %1 $\sigma$ | 37Ar<br>[V] | %1 $\sigma$ | 38Ar<br>[V] | %1 $\sigma$ | 39Ar<br>[V] | %1 $\sigma$ | 40Ar<br>[V] | %1 $\sigma$ | 40(r)/39(k) $\pm 2\sigma$ | Age $\pm 2\sigma$<br>(Ma) | 40Ar(r)<br>(%) | 39Ar(k)<br>(%) |
|--------|-------------|-------------|-------------|-------------|-------------|-------------|-------------|-------------|-------------|-------------|-------------|---------------------------|---------------------------|----------------|----------------|
| T11N21 | 400 °C      | 0,0004656   | 19,893      | 0,0001157   | 695,809     | 0,0001331   | 32,972      | 0,0010507   | 10,931      | 0,1453657   | 0,485       | 7,41127 $\pm$ 52,15403    | 52,25 $\pm$ 362,46        | 5,36           | 0,08           |
| T11N21 | 500 °C      | 0,0004853   | 19,100      | -           | 1108,393    | 0,0001939   | 21,047      | 0,0023530   | 4,841       | 0,1634988   | 0,397       | 8,52813 $\pm$ 23,30710    | 60,00 $\pm$ 161,29        | 12,27          | 0,18           |
| T11N21 | 600 °C      | 0,0003748   | 24,243      | -           | 4507,282    | 0,0001538   | 28,558      | 0,0055124   | 2,586       | 0,1488528   | 0,464       | 6,90416 $\pm$ 9,75121     | 48,73 $\pm$ 67,90         | 25,57          | 0,41           |
| T11N21 | 700 °C      | 0,0010789   | 10,135      | 0,0005567   | 144,696     | 0,0050601   | 3,455       | 0,1081224   | 1,475       | 0,6142698   | 0,178       | 2,72722 $\pm$ 0,60378     | 19,40 $\pm$ 4,27          | 48,00          | 8,11           |
| T11N21 | 800 °C      | 0,0007688   | 12,922      | 0,0001606   | 501,627     | 0,0189762   | 3,219       | 0,4410519   | 1,476       | 1,3287455   | 0,107       | 2,49155 $\pm$ 0,15227     | 17,74 $\pm$ 1,08          | 82,70          | 33,10          |
| T11N21 | 833 °C      | 0,0002012   | 44,186      | 0,0000713   | 1130,088    | 0,0099097   | 5,061       | 0,1594592   | 1,484       | 0,4561409   | 0,197       | 2,48406 $\pm$ 0,33777     | 17,68 $\pm$ 2,39          | 86,84          | 11,97          |
| T11N21 | 866 °C      | 0,0000843   | 104,894     | 0,0004242   | 189,927     | 0,0032160   | 3,261       | 0,0738891   | 1,498       | 0,2189299   | 0,302       | 2,62038 $\pm$ 0,71169     | 18,65 $\pm$ 5,04          | 88,44          | 5,55           |
| T11N21 | 900 °C      | -           | 112,739     | 0,0000788   | 1021,614    | 0,0002658   | 16,041      | 0,0076971   | 2,060       | 0,0166187   | 3,785       | 5,15735 $\pm$ 6,77916     | 36,52 $\pm$ 47,53         | 238,86         | 0,58           |
| T11N21 | 933 °C      | 0,0002207   | 40,397      | 0,0003161   | 255,166     | 0,0020146   | 5,686       | 0,0463103   | 1,504       | 0,1850220   | 0,408       | 2,58132 $\pm$ 1,14112     | 18,37 $\pm$ 8,08          | 64,61          | 3,48           |
| T11N21 | 966 °C      | 0,0000383   | 229,788     | -           | 16313,332   | 0,0009052   | 6,492       | 0,0242983   | 1,546       | 0,0855761   | 0,707       | 3,04942 $\pm$ 2,14284     | 21,68 $\pm$ 15,15         | 86,58          | 1,82           |
| T11N21 | 1000 °C     | 0,0000629   | 139,896     | 0,0000539   | 1495,067    | 0,0016513   | 4,455       | 0,0408831   | 1,519       | 0,1223480   | 0,502       | 2,53147 $\pm$ 1,27539     | 18,02 $\pm$ 9,03          | 84,59          | 3,07           |
| T11N21 | 1050 °C     | 0,0000999   | 88,417      | -           | 624,402     | 0,0041268   | 12,060      | 0,1406822   | 1,490       | 0,3787965   | 0,251       | 2,47485 $\pm$ 0,37872     | 17,62 $\pm$ 2,68          | 91,91          | 10,56          |
| T11N21 | 1100 °C     | 0,0001458   | 60,950      | -           | 320,158     | 0,0055099   | 4,419       | 0,1483846   | 1,490       | 0,4017529   | 0,230       | 2,41014 $\pm$ 0,36149     | 17,16 $\pm$ 2,56          | 89,02          | 11,14          |
| T11N21 | 1200 °C     | 0,0001427   | 61,989      | -           | 386,165     | 0,0055375   | 3,087       | 0,1284217   | 1,483       | 0,3499915   | 0,225       | 2,39079 $\pm$ 0,41339     | 17,02 $\pm$ 2,93          | 87,72          | 9,64           |
| T11N21 | 1400 °C     | 0,0000305   | 288,353     | -           | 656,858     | 0,0001370   | 29,484      | 0,0043245   | 2,971       | 0,0394359   | 1,562       | 7,02157 $\pm$ 12,04896    | 49,54 $\pm$ 83,86         | 77,00          | 0,32           |

Table A29

| Sample | Temperature | 36Ar<br>[V] | %1σ   | 37Ar<br>[V] | %1σ      | 38Ar<br>[V] | %1σ    | 39Ar<br>[V] | %1σ    | 40Ar<br>[V] | %1σ   | 40(r)/39(k) ± 2σ   | Age ± 2σ<br>(Ma) | 40Ar(r)<br>(%) | 39Ar(k)<br>(%) |
|--------|-------------|-------------|-------|-------------|----------|-------------|--------|-------------|--------|-------------|-------|--------------------|------------------|----------------|----------------|
| T11N51 | 400 °C      | 0,0010574   | 6,132 | -           | 310,073  | 0,0003442   | 6,004  | 0,0011197   | 15,640 | 0,3133398   | 0,276 | 0,76060 ± 34,31280 | 5,43 ± 244,72    | 0,27           | 0,08           |
| T11N51 | 500 °C      | 0,0007414   | 6,149 | -           | 642,188  | 0,0001749   | 16,288 | 0,0027929   | 6,528  | 0,2368391   | 0,367 | 6,34925 ± 9,71721  | 44,86 ± 67,81    | 7,49           | 0,21           |
| T11N51 | 600 °C      | 0,0003469   | 7,343 | 0,0004148   | 177,545  | 0,0000953   | 17,006 | 0,0040449   | 4,741  | 0,1129959   | 0,560 | 2,58981 ± 3,74766  | 18,43 ± 26,54    | 9,27           | 0,30           |
| T11N51 | 700 °C      | 0,0002915   | 6,990 | -           | 964,773  | 0,0002732   | 8,711  | 0,0163832   | 1,847  | 0,1142096   | 0,559 | 1,70394 ± 0,74271  | 12,15 ± 5,28     | 24,44          | 1,22           |
| T11N51 | 800 °C      | 0,0005597   | 6,333 | -           | 132,681  | 0,0008628   | 4,064  | 0,0640803   | 1,511  | 0,2342209   | 0,336 | 1,06386 ± 0,32990  | 7,59 ± 2,35      | 29,11          | 4,75           |
| T11N51 | 833 °C      | 0,0002338   | 7,224 | -           | 2726,789 | 0,0005967   | 10,123 | 0,0608048   | 1,508  | 0,1538908   | 0,474 | 1,38493 ± 0,17127  | 9,88 ± 1,22      | 54,72          | 4,51           |
| T11N51 | 866 °C      | 0,0006129   | 6,213 | -           | 433,029  | 0,0022963   | 3,503  | 0,1763263   | 1,494  | 0,3996552   | 0,196 | 1,22958 ± 0,13332  | 8,77 ± 0,95      | 54,25          | 13,08          |
| T11N51 | 900 °C      | 0,0006619   | 6,228 | -           | 534,573  | 0,0018762   | 6,885  | 0,1602280   | 1,486  | 0,3845520   | 0,179 | 1,16957 ± 0,15645  | 8,35 ± 1,11      | 48,73          | 11,88          |
| T11N51 | 933 °C      | 0,0004758   | 6,621 | -           | 448,780  | 0,0020648   | 5,751  | 0,1739859   | 1,513  | 0,3537696   | 0,333 | 1,21539 ± 0,11411  | 8,67 ± 0,81      | 59,77          | 12,90          |
| T11N51 | 966 °C      | 0,0004008   | 6,496 | -           | 320,900  | 0,0010301   | 17,215 | 0,1388917   | 1,497  | 0,2830847   | 0,322 | 1,17551 ± 0,11715  | 8,39 ± 0,83      | 57,67          | 10,30          |
| T11N51 | 1000 °C     | 0,0002872   | 6,811 | 0,0001848   | 398,360  | 0,0010045   | 11,657 | 0,1083972   | 1,500  | 0,2239029   | 0,341 | 1,27301 ± 0,11431  | 9,08 ± 0,81      | 61,63          | 8,04           |
| T11N51 | 1050 °C     | 0,0002282   | 7,988 | -           | 102,095  | 0,0010868   | 13,114 | 0,1075034   | 1,492  | 0,2054866   | 0,339 | 1,27404 ± 0,10804  | 9,09 ± 0,77      | 66,65          | 7,97           |
| T11N51 | 1100 °C     | 0,0001875   | 7,959 | -           | 109,544  | 0,0009890   | 10,445 | 0,1048059   | 1,500  | 0,1871264   | 0,357 | 1,24660 ± 0,09304  | 8,90 ± 0,66      | 69,82          | 7,77           |
| T11N51 | 1200 °C     | 0,0002134   | 8,250 | -           | 553,858  | 0,0022447   | 6,010  | 0,1940732   | 1,484  | 0,3065126   | 0,221 | 1,24462 ± 0,06554  | 8,88 ± 0,47      | 78,80          | 14,39          |
| T11N51 | 1400 °C     | 0,0001779   | 8,305 | 0,0003463   | 212,657  | 0,0003083   | 13,642 | 0,0348234   | 1,555  | 0,1595236   | 0,409 | 3,06254 ± 0,27106  | 21,78 ± 1,92     | 66,85          | 2,58           |

Table A30

## Appendix A31

Bulk sample of biotites were irradiated in Pavie Reactor from February 26<sup>th</sup> to 27<sup>th</sup>, and a total power of 50.00 MWh. Irradiation interference on K, Ca and Cl were corrected by irradiating and analyzing KCl and CaF<sub>2</sub> pure salts and were found to be reproducible. J factors were estimated by the use of duplicates of TCR2 standard with an age of  $28.340 \pm 0.099$  Ma [Renne et al., 1998]. For the present analyse a value of  $0.00395590 \pm 0.00000554$  was calculated.

The samples were analyzed in Montpellier using the same apparatus and the same protocol, as described in [Arnaud et al., 2003]. Samples were loaded in an aluminium packet into a double vacuum Staudacher type furnace and step heated; temperature is calibrated by means of a thermocouple. Classical furnace step heating was conducted from 500°C to 1400°C. The gas was purified using cold traps with liquid air and Al-Zr getters. Once cleaned, the gas was introduced into a VG3600 mass spectrometer and allowed to equilibrate for 2 minutes prior to analysis was done statically. Signals were measured by the mean of a Faraday cup with a  $10^{11}$  ohm resistor for <sup>40</sup>Ar and <sup>39</sup>Ar while <sup>39</sup>Ar, <sup>38</sup>Ar, <sup>37</sup>Ar and <sup>36</sup>Ar were analyzed with a photomultiplier after interaction on a Daly plate. Gain between both collectors was estimated by duplicate analysis of <sup>39</sup>Ar on both collectors during each analysis, and also by statistical analysis over a period of several years. This gain is 50 and is known at better than 1.5%. This error is included in the age calculation, along with analytical errors on each signal and errors on the blank values which amount is calibrated before every sample analysis by blank steps at 500°C, 1000°C and 1200°C.

### References:

- Arnaud, N., P. Tapponnier, F. Roger, M. Brunel, U. Scharer, C. Wen, and Z. Q. Xu (2003), Evidence for Mesozoic shear along the western Kunlun and Altyn-Tagh fault, northern Tibet (China), *Journal of Geophysical Research-Solid Earth*, 108, DOI: 10.1029/2001JB000904 doi: 0148-0227.
- Renne, P. R., C. C. Swisher, A. L. Deino, D. B. Karner, T. L. Owens, and D. J. DePaolo (1998), Intercalibration of standards, absolute ages and uncertainties in Ar-40/Ar-39 dating, *Chemical Geology*, 145, 117-152. doi: 0009-2541.



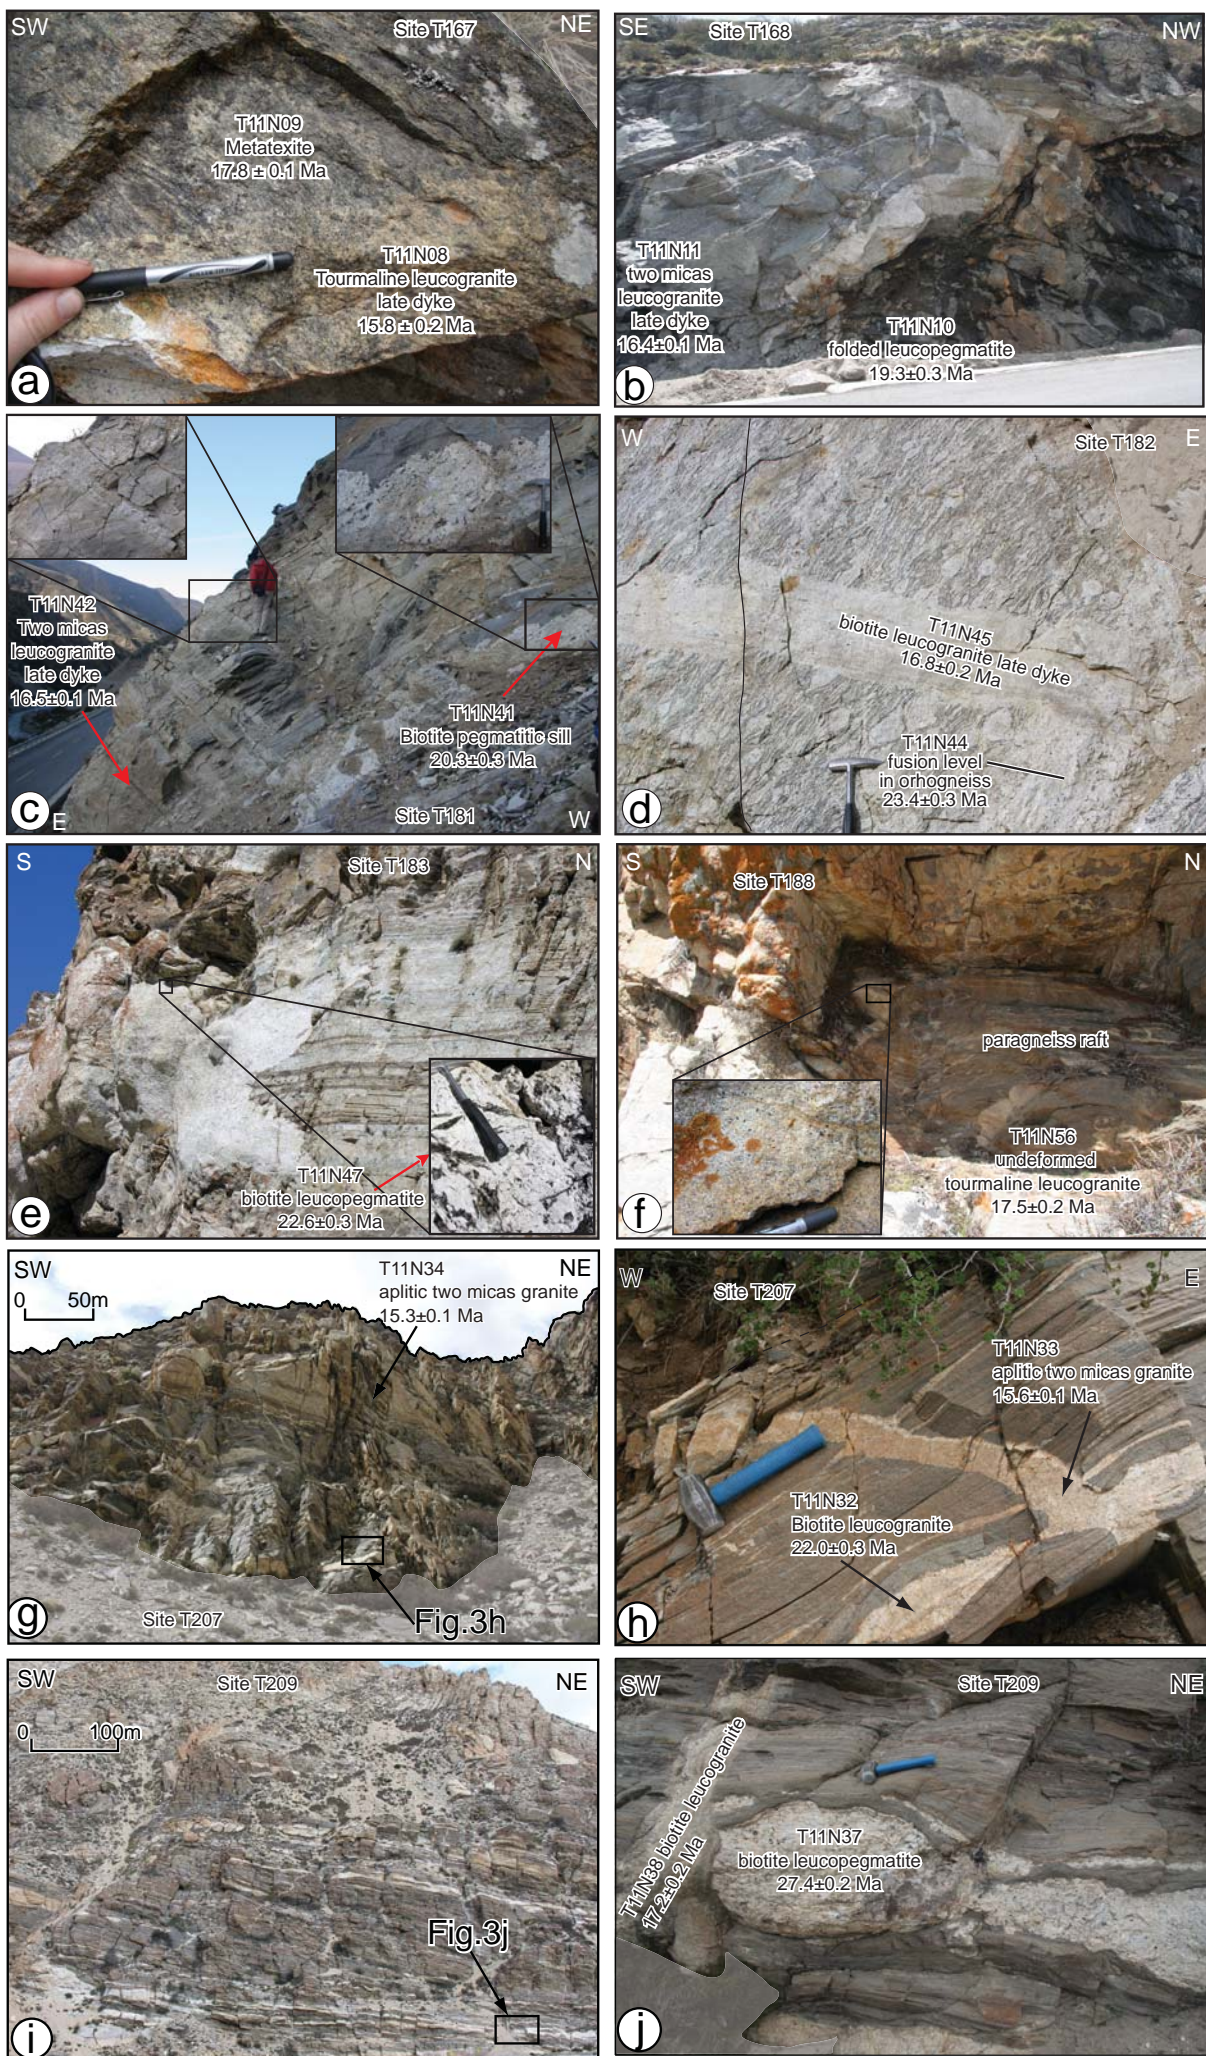

Fig. 3



A33 T204

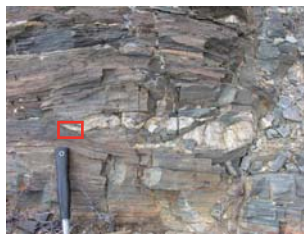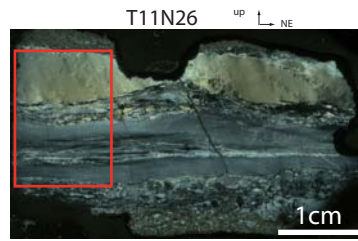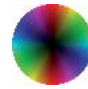

GBM

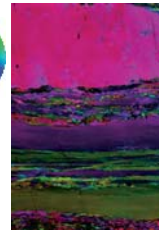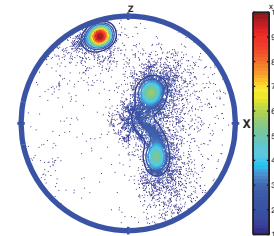

⇌ ?  
Prism <a>  
(+ Basal <a>)

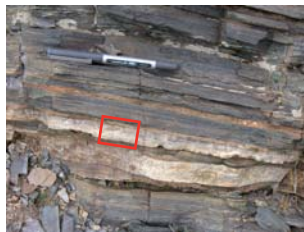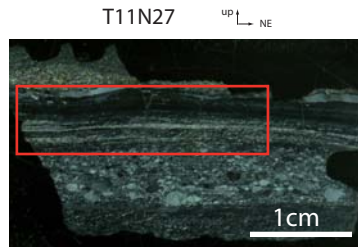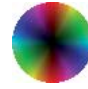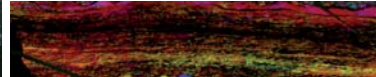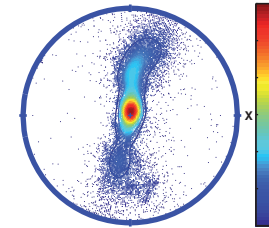

T204  
⇌  
Prism <a>  
+ Basal <a> ?

A34

T206

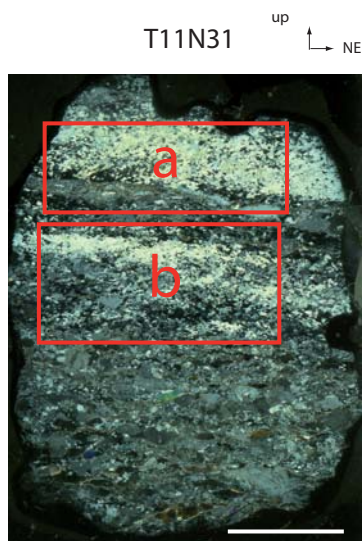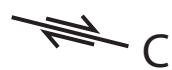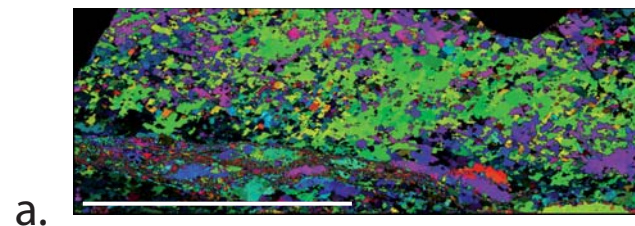

BLG

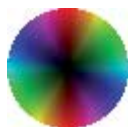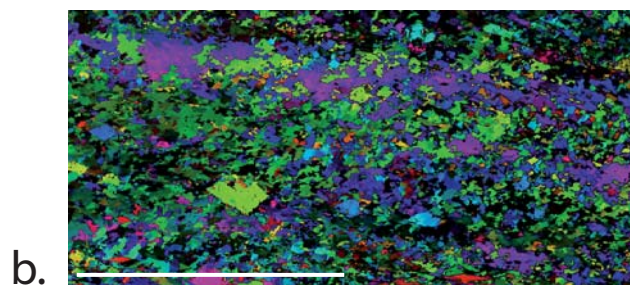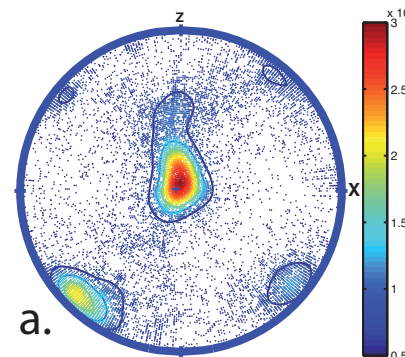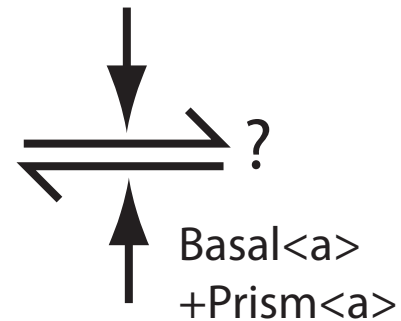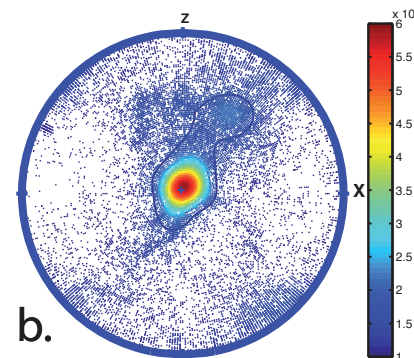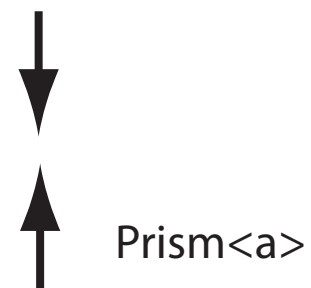

A35

T213

T11N53A

up  
NE

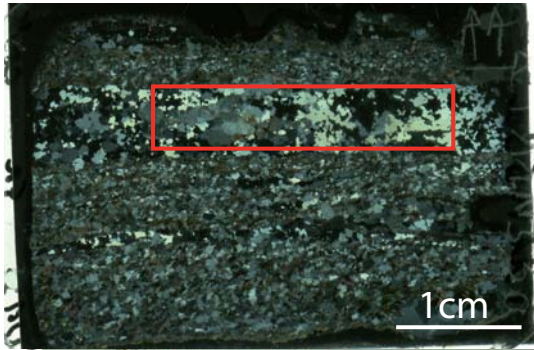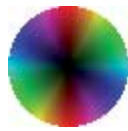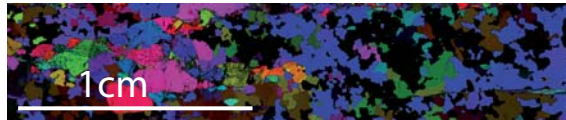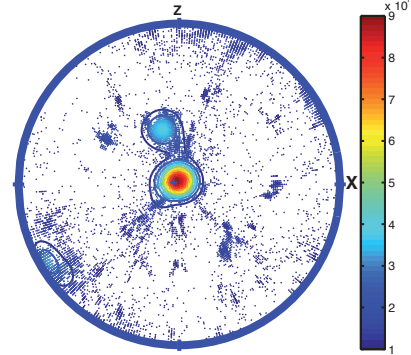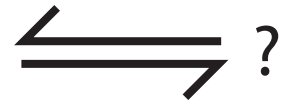

Prism<a>  
+ Prism<c>

A36 T210

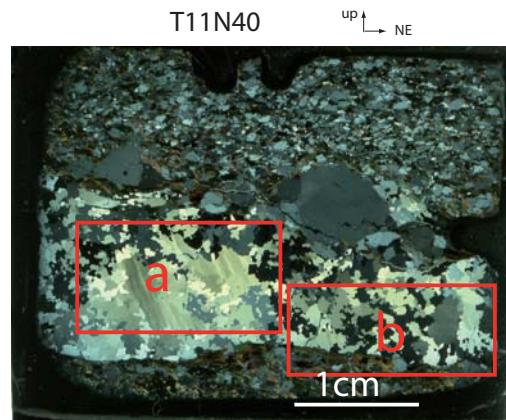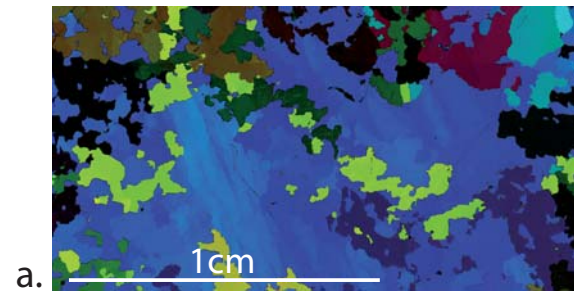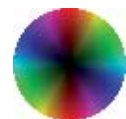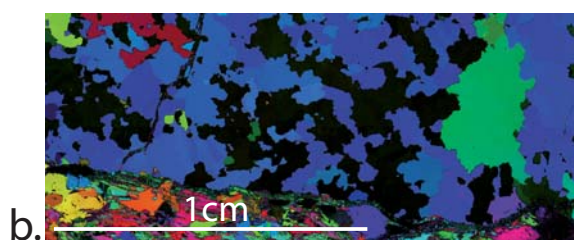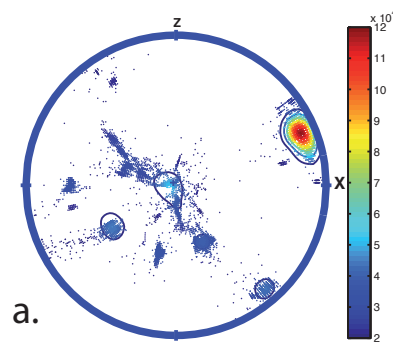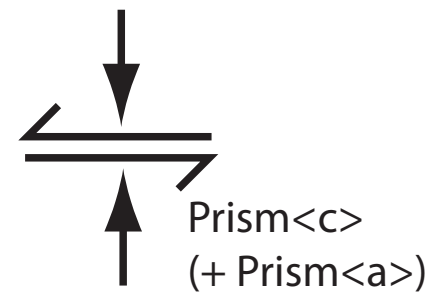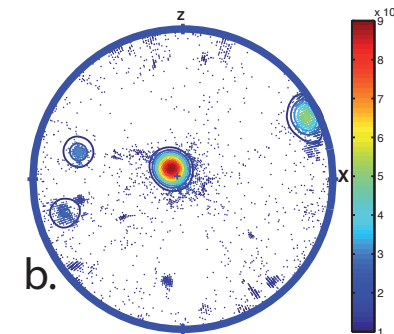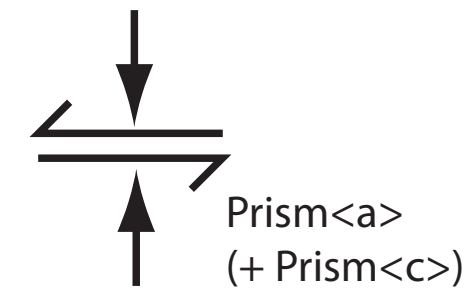

Supplement: Supplementary file 1 [file 1]
